# Supplementary material
Source: PubMed Central journal article supplement (PMC7102444)
Supplement: NIHMS1561264-supplement-SI_for_the_paper.pdf [file NIHMS1561264-supplement-SI_for_the_paper.pdf]

# Catalyzing the Hydrodefluorination of CF<sub>3</sub>-substituted Alkenes by PhSiH<sub>3</sub>. H• Transfer from a Nickel Hydride

**Authors:** Chengbo Yao<sup>1</sup>, Shuai Wang<sup>1</sup>, Jack Norton<sup>1\*</sup>, Matthew Hammond<sup>1</sup>

## **Affiliations:**

<sup>1</sup>Department of Chemistry, Columbia University, 3000 Broadway, New York, New York 10027, United States.

\*Corresponding authors. Email: [jrn11@columbia.edu](mailto:jrn11@columbia.edu) (J.N.)

## Supporting Information

### Table of Contents

|                                                                  |                   |
|------------------------------------------------------------------|-------------------|
| <b><u>NMR SPECTRUM FOR PHSIF<sub>3</sub> FORMATION .....</u></b> | <b><u>S2</u></b>  |
| <b><u>SYNTHESIS OF SUBSTRATES .....</u></b>                      | <b><u>S2</u></b>  |
| <b><u>PRODUCT PURIFICATION AND CHARACTERIZATION .....</u></b>    | <b><u>S5</u></b>  |
| <b><u>NMR ASSIGNMENT OF COMPOUND 6.....</u></b>                  | <b><u>S11</u></b> |
| <b><u>NMR SPECTRA .....</u></b>                                  | <b><u>S15</u></b> |
| <b><u>TABLE 1. ....</u></b>                                      | <b><u>S32</u></b> |
| <b><u>REFERENCES .....</u></b>                                   | <b><u>S33</u></b> |

## NMR Spectrum for PhSiF<sub>3</sub> formation

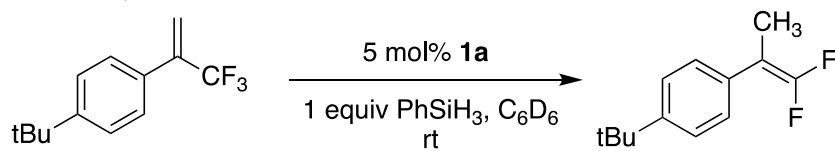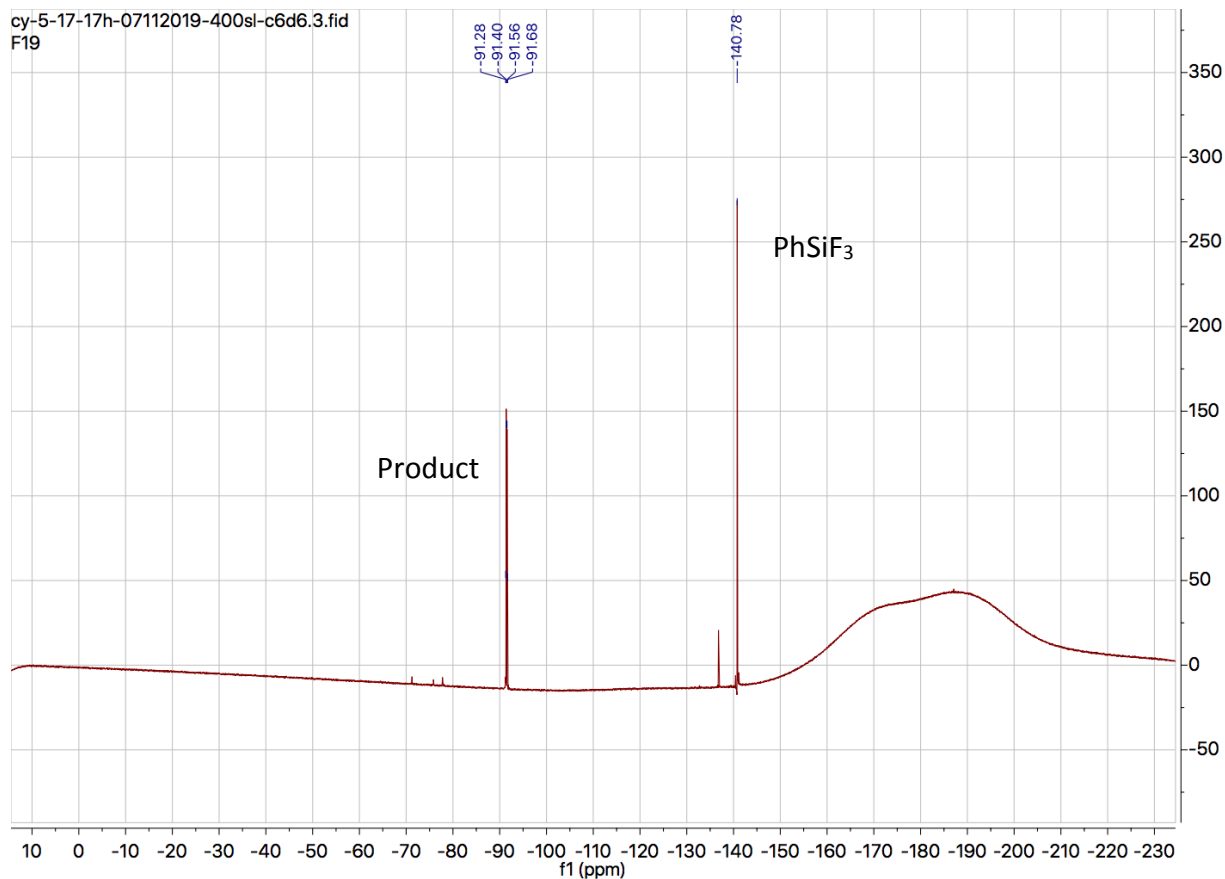

**Figure S1.** <sup>19</sup>F-NMR before workup. The peak at -140.8 ppm matches well with reported chemical shift value for PhSiF<sub>3</sub>.<sup>1</sup>

## Synthesis of Substrates

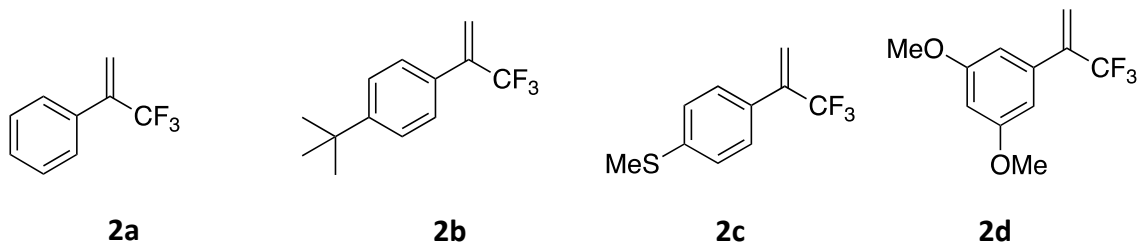

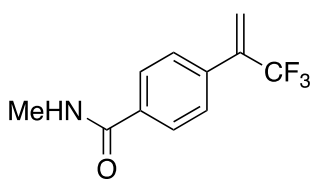

**2e**

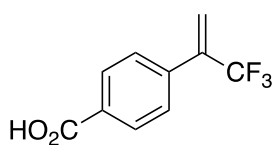

**2f**

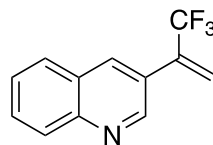

**2g**

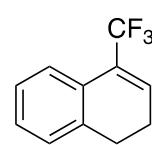

**2h**

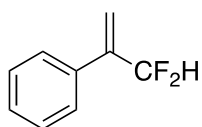

**2i**

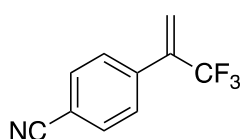

**2j**

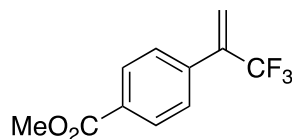

**2k**

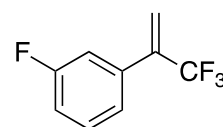

**2l**

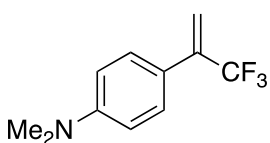

**2m**

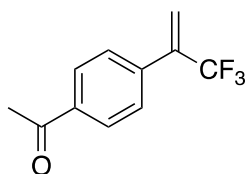

**2n**

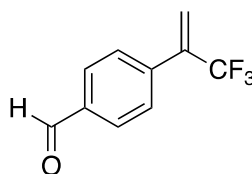

**2o**

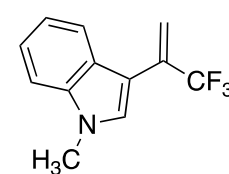

**2p**

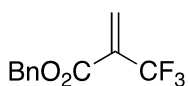

**2q**

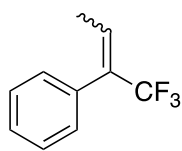

**2r**

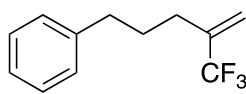

**2s**

The substrates **2a**<sup>2</sup>, **2b**<sup>3</sup>, **2c**<sup>4</sup>, **2d**<sup>5</sup>, **2e-f**<sup>4</sup>, **2g-2i**, **2s**<sup>6</sup>, **2r**<sup>7</sup> and **2q**<sup>8</sup> were prepared by literature methods. Substrates **2j**, **2k**, **2n**, and **2o** were synthesized by modifying the method reported by the Molander group.<sup>9</sup> Substrates **2l**, **2m**, and **2p** were synthesized by Wittig reaction.

General procedure for the synthesis of **2j**, **2k**, **2n**, and **2o**

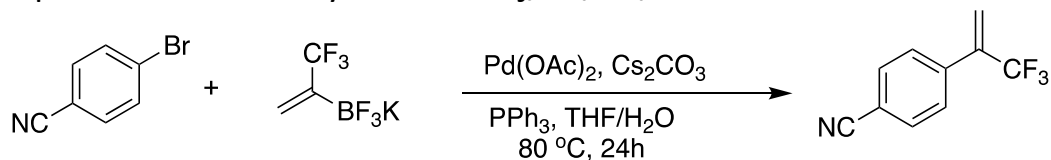

**4-(3,3,3-trifluoroprop-1-en-2-yl)benzonitrile, 2j**

To a 50 mL oven-dried Schlenk flask was added 4-bromobenzonitrile (273 mg, 1.5 mmol, 1 equiv), Cs<sub>2</sub>CO<sub>3</sub> (1.47g, 4.5 mmol, 3 equiv), potassiumtrifluoro(3,3,3-trifluoroprop-1-en-2-yl)borate (455 mg, 2.25 mmol, 1.5 equiv), Pd(OAc)<sub>2</sub> (17 mg, 0.075 mmol, 0.05 equiv), and PPh<sub>3</sub> (47 mg, 0.18 mmol, 0.12equiv). The Schlenk flask was evacuated and then refilled with argon. A mixture of degassed THF (9 mL) and degassed deionized H<sub>2</sub>O (4.5 mL) were added via syringe. The reaction mixture was allowed to stir at 80 °C for 24h. Once complete the reaction was cooled to room temperature and diluted in EtOAc (25 mL). The reaction mixture was transferred to a separatory funnel and further diluted with deionized H<sub>2</sub>O (25 mL). The layers were separated, and the aq layer was extracted with EtOAc (2 × 25 mL). The combined organic layers were washed with 1M aqNaOH (25 mL), deionized H<sub>2</sub>O (25 mL), and brine (25 mL). The combined organic layers were dried (Na<sub>2</sub>SO<sub>4</sub>) and the solvent was removed in vacuo by rotary evaporation. Further purification was achieved by SiO<sub>2</sub> column (5% EtOAc in hexanes) to give the desired product **2j** (177mg, 60%). The <sup>1</sup>H-NMR spectrum was in agreement with that reported in the reference.<sup>8</sup>

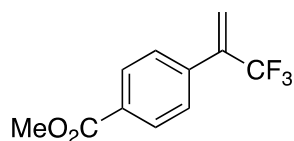

**methyl 4-(3,3,3-trifluoroprop-1-en-2-yl)benzoate, 2k** was prepared according to the general procedure. The desired product was purified by flash column with 2.5% EtOAc in hexanes. The <sup>1</sup>H-NMR spectrum was in agreement with that reported in the reference.<sup>4</sup>

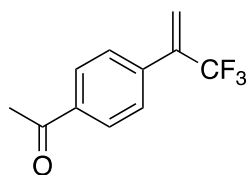

**1-(4-(3,3,3-trifluoroprop-1-en-2-yl)phenyl)ethan-1-one, 2n** was prepared according to the general procedure. The desired product was purified by flash column with 10% EtOAc in hexanes. The <sup>1</sup>H-NMR spectrum was in agreement with that reported in the reference.<sup>10</sup>

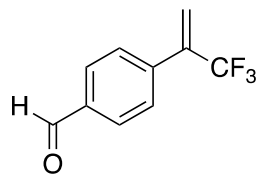

**4-(3,3,3-trifluoroprop-1-en-2-yl)benzaldehyde, 2o** was prepared according to the general procedure. The desired product was purified by flash column with 10% EtOAc in hexanes. The <sup>1</sup>H-NMR spectrum was in agreement with that reported in the reference.<sup>8</sup>

## General Procedure for the synthesis of **2l**, **2m**, and **2p**

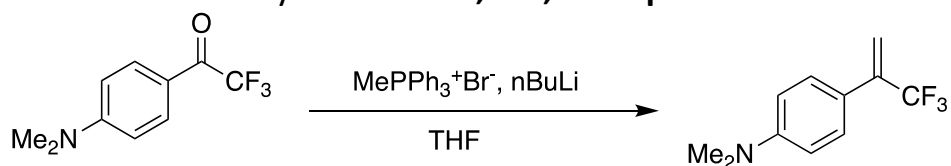

### **N,N-dimethyl-4-(3,3,3-trifluoroprop-1-en-2-yl)aniline, 2m**

To a 50 ml oven-dried Schlenk flask, were added methyl triphenylphosphonium bromide (1.79 g, 5 mmol, 1.25 equiv) and dry THF (10 ml).  $\text{nBuLi}$  (4 mmol, 1 equiv) was added dropwise at 0 °C. After stirring the mixture for 10 min, 1-(4-(dimethylamino)phenyl)-2,2,2-trifluoroethan-1-one (872 mg, 4 mmol, 1 equiv) in dry THF (10 ml) was added at -78 °C. The reaction mixture was allowed to stir at rt for 3h. Once complete the reaction was cooled to room temperature and diluted with diethyl ether. The reaction mixture was quenched by  $\text{NH}_4\text{Cl}$  (aq) and then transferred to a separatory funnel. The layers were separated, and the aq layer was extracted with ether. The combined organic layers were washed with deionized  $\text{H}_2\text{O}$  (25 mL), and brine (25 mL). The combined organic layers were dried ( $\text{Na}_2\text{SO}_4$ ) and the solvent was removed in vacuo by rotary evaporation. Further purification was achieved by  $\text{SiO}_2$  column (5% EtOAc in hexanes) to give the desired product **2m** (570mg, 66%). The  $^1\text{H-NMR}$  spectrum was in agreement with that reported in the reference.<sup>6</sup>

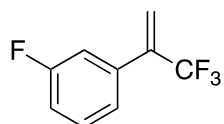

**1-fluoro-3-(3,3,3-trifluoroprop-1-en-2-yl)benzene, 2l** was prepared according to the general procedure. The desired product was purified by flash column with pure hexanes. The  $^1\text{H-NMR}$  spectrum was in agreement with that reported in the reference.<sup>11</sup>

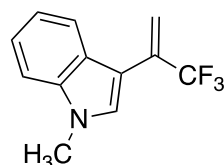

**1-methyl-3-(3,3,3-trifluoroprop-1-en-2-yl)-1H-indole, 2p** was prepared according to the general procedure. The desired product was purified by flash column with 10% EtOAc in hexanes. The  $^1\text{H-NMR}$  spectrum was in agreement with that reported in the reference.<sup>12</sup>

## Product Purification and Characterization

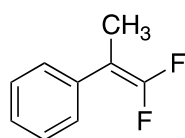

**(1,1-difluoroprop-1-en-2-yl)benzene, 3a** Flash column chromatography was done using pure hexane. Product was obtained with 88% yield. Spectral data matches the reported data in the literature.<sup>13</sup>

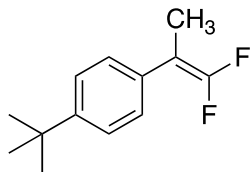

**1-(tert-butyl)-4-(1,1-difluoroprop-1-en-2-yl)benzene, 3b** Flash column chromatography was done using pure hexane. Product was obtained with 91% yield. Spectral data matches the reported data in the literature.<sup>14</sup>

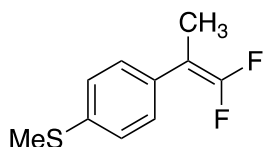

**(4-(1,1-difluoroprop-1-en-2-yl)phenyl)(methyl)sulfane, 3c** Flash column chromatography was done using pure hexane. Product was obtained with 92% yield. <sup>1</sup>H NMR (400 MHz, Chloroform-*d*) δ 7.29 (m, 4H), 2.51 (s, 3H), 1.98 (t, *J* = 3.4 Hz, 3H). <sup>19</sup>F NMR (376 MHz, Chloroform-*d*) AB system (δ<sub>A</sub> = -90.20, δ<sub>B</sub> = -90.44, <sup>2</sup>J<sub>F,F</sub> = 43.7 Hz). <sup>13</sup>C NMR (101 MHz, Chloroform-*d*) δ 153.45 (dd, *J* = 290.0, 286.1 Hz), 137.29, 131.60 (t, *J* = 3.8 Hz), 127.96 – 127.66 (m), 126.49, 87.03 (dd, *J* = 22.6, 14.6 Hz), 15.80, 13.11. HRMS-ASAP+ (*m/z*): calcd for C<sub>10</sub>H<sub>11</sub>F<sub>2</sub>S [M+H]<sup>+</sup>: 201.0549, found: 201.0542

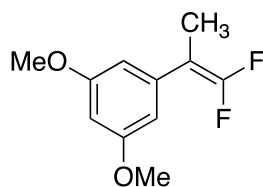

**1-(1,1-difluoroprop-1-en-2-yl)-3,5-dimethoxybenzene, 3d** Flash column chromatography was done using 5% ethyl acetate/hexanes mixture. Product was obtained with 92% yield. <sup>1</sup>H NMR (400 MHz, Chloroform-*d*) δ 6.54 (dd, *J* = 2.3, 1.1 Hz, 2H), 6.41 (t, *J* = 2.3 Hz, 1H), 3.82 (s, 6H), 1.97 (t, *J* = 3.4 Hz, 3H). <sup>19</sup>F NMR (376 MHz, Chloroform-*d*) AB system (δ<sub>A</sub> = -89.48, δ<sub>B</sub> = -89.89, <sup>2</sup>J<sub>F,F</sub> = 42.6 Hz). <sup>13</sup>C NMR (101 MHz, Chloroform-*d*) δ 160.67, 153.51 (dd, *J* = 290.5, 285.9 Hz), 136.86 (t, *J* = 4.2 Hz), 105.96 (dd, *J* = 4.8, 3.4 Hz), 99.09, 87.63 (dd, *J* = 22.9, 14.0 Hz), 55.33, 13.33 (t, *J* = 1.8 Hz). HRMS-ASAP+ (*m/z*): calcd for C<sub>11</sub>H<sub>13</sub>F<sub>2</sub>O<sub>2</sub> [M+H]<sup>+</sup>: 215.0884, found: 215.0880

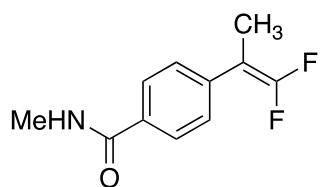

**4-(1,1-difluoroprop-1-en-2-yl)-N-methylbenzamide, 3e** Flash column chromatography was done using 50% ethyl acetate/hexanes mixture. Product was obtained with 96% yield.  $^1\text{H}$  NMR (400 MHz, Chloroform-*d*)  $\delta$  7.77 (m, 2H), 7.41 (m, 2H), 6.51 (br, 1H), 3.01 (d,  $J = 4.9$  Hz, 3H), 1.99 (t,  $J = 3.4$  Hz, 3H).  $^{13}\text{C}$  NMR (101 MHz, Chloroform-*d*)  $\delta$  167.81, 153.74 (dd,  $J = 292.1, 287.3$  Hz), 137.98 (t,  $J = 4.5$  Hz), 133.06, 127.47 (dd,  $J = 5.1, 3.3$  Hz), 126.94, 87.16 (dd,  $J = 23.2, 13.6$  Hz), 26.81, 12.94 (t,  $J = 1.9$  Hz).  $^{19}\text{F}$  NMR (376 MHz, Chloroform-*d*) ABX3 system ( $\delta_{\text{A}} = -88.29$ ,  $\delta_{\text{B}} = -88.87$ ,  $^2J_{\text{F,F}} = 39.4$  Hz,  $^4J_{\text{H,F}} = 3.9$  Hz). HRMS-ASAP+ ( $m/z$ ): calcd for  $\text{C}_{11}\text{H}_{12}\text{F}_2\text{NO}$  [ $\text{M}+\text{H}$ ] $^+$ : 212.0887, found: 212.0881

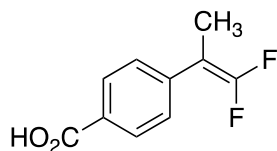

**4-(1,1-difluoroprop-1-en-2-yl)benzoic acid, 3f** Flash column chromatography was done using 50% ethyl acetate/hexanes mixture. Product was obtained with 82% yield.  $^1\text{H}$  NMR (400 MHz, Chloroform-*d*)  $\delta$  10.77 (br, 1H), 8.13 (m, 2H), 7.51 (m, 2H), 2.04 (t,  $J = 3.4$  Hz, 2H).  $^{13}\text{C}$  NMR (101 MHz, Chloroform-*d*)  $\delta$  171.92, 153.95 (dd,  $J = 293.1, 288.0$  Hz), 140.59 (t,  $J = 5$  Hz), 130.28, 127.82, 127.46 (dd,  $J = 5.2, 3.4$  Hz), 87.33 (dd,  $J = 23.4, 13.2$  Hz), 12.90.  $^{19}\text{F}$  NMR (376 MHz, Chloroform-*d*) AB system ( $\delta_{\text{A}} = -87.12$ ,  $\delta_{\text{B}} = -87.70$ ,  $^2J_{\text{F,F}} = 36.5$  Hz). HRMS-ESI ( $m/z$ ): calcd for  $\text{C}_{10}\text{H}_7\text{F}_2\text{O}_2$  [ $\text{M}-\text{H}$ ] $^-$ : 197.0414, found: 197.0439

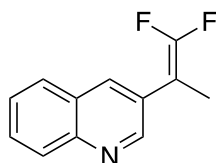

**3-(1,1-difluoroprop-1-en-2-yl)quinoline, 3g** Flash column chromatography was done using 20% ethyl acetate/hexanes mixture. Product was obtained with 90% yield.  $^1\text{H}$  NMR (400 MHz, Chloroform-*d*)  $\delta$  8.98 (m, 1H), 8.21 – 8.01 (m, 2H), 7.82 (d,  $J = 8.2$  Hz, 1H), 7.72 (t,  $J = 7.8$  Hz, 1H), 7.57 (t,  $J = 7.6$  Hz, 1H), 2.04-2.18 (m, 3H).  $^{19}\text{F}$  NMR (376 MHz, Chloroform-*d*) AB system ( $\delta_{\text{A}} = -87.91$ ,  $\delta_{\text{B}} = -88.88$ ,  $^2J_{\text{F,F}} = 39.3$  Hz).  $^{13}\text{C}$  NMR (101 MHz, Chloroform-*d*)  $\delta$  154.00 (dd,  $J = 291.6, 288.3$  Hz), 149.66 (d,  $J = 6.6$  Hz), 146.89, 133.83 (t,  $J = 4.1$  Hz), 129.54, 129.19, 128.12 (t,  $J = 4.1$  Hz), 127.76, 127.66, 127.02, 85.29 (dd,  $J = 24.4, 14.6$  Hz), 12.98 (t,  $J = 1.8$  Hz). HRMS-ASAP+ ( $m/z$ ): calcd for  $\text{C}_{12}\text{H}_{10}\text{F}_2\text{N}$  [ $\text{M}+\text{H}$ ] $^+$ : 206.0781, found: 206.0777

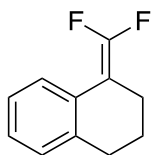

**1-(difluoromethylene)-1,2,3,4-tetrahydronaphthalene, 3h** The reaction was carried out at 70 °C. Flash column chromatography was done using pure hexanes. Product was obtained with 75% yield. Spectral data matches the reported data in the literature.<sup>15</sup>

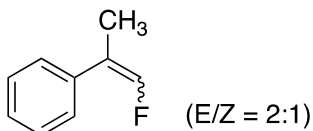

**(1-fluoroprop-1-en-2-yl)benzene, 3i** The reaction was carried out at 50 °C. Flash column chromatography was done using pure hexanes. Product was obtained with 77% yield. Spectral data matches the reported data in the literature.<sup>16</sup>

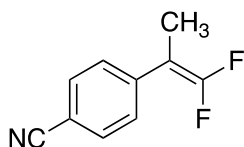

**4-(1,1-difluoroprop-1-en-2-yl)benzonitrile, 3j** Flash column chromatography was done using 5% ethyl acetate/hexanes mixture. Product was obtained with 80% yield. Spectral data matches the reported data in the literature.<sup>17</sup>

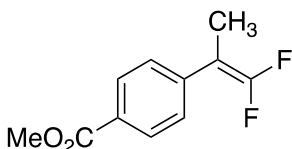

**methyl 4-(1,1-difluoroprop-1-en-2-yl)benzoate, 3k** Flash column chromatography was done using 5% ethyl acetate/hexanes mixture. Product was obtained with 90% yield. Spectral data matches the reported data in the literature.<sup>18</sup>

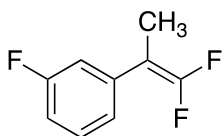

**1-(1,1-difluoroprop-1-en-2-yl)-3-fluorobenzene, 3l** Flash column chromatography was done using pure hexanes. Product was obtained with 86% yield. <sup>1</sup>H NMR (400 MHz, Chloroform-d) δ 7.34 (td, J = 8.0, 6.2 Hz, 1H), 7.18 (ddt, J = 7.9, 2.0, 1.0 Hz, 1H), 7.11 (ddt, J = 10.6, 2.6, 1.1 Hz, 1H), 6.99 (tdd, J = 8.4, 2.6, 1.0 Hz, 1H), 1.99 (t, J = 3.4 Hz, 3H). <sup>19</sup>F NMR (376 MHz, Chloroform-d) ABX3 system (δA = -93.09, δB = -93.21, <sup>2</sup>J<sub>F,F</sub> = 50.3 Hz, <sup>4</sup>J<sub>H,F</sub> = 3.9 Hz), δ -113.17 (td, J = 9.8, 6.5



Hz).  $^{13}\text{C}$  NMR (101 MHz, Chloroform-*d*)  $\delta$  163.99, 161.55, 153.70 (dd,  $J = 291.3, 286.8$  Hz), 129.77 (d,  $J = 8.5$  Hz), 123.08 (dt,  $J = 4.9, 3.1$  Hz), 114.50 (ddd,  $J = 22.6, 5.2, 3.4$  Hz), 113.94 (d,  $J = 21.0$  Hz), 86.95 (ddd,  $J = 22.9, 14.2, 2.4$  Hz), 13.01 (t,  $J = 1.7$  Hz). HRMS-ASAP+ ( $m/z$ ): calcd for  $\text{C}_9\text{H}_8\text{F}_3$   $[\text{M}+\text{H}]^+$ : 173.0578, found: 173.0568

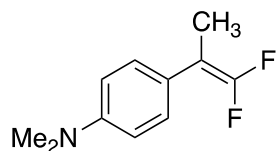

**4-(1,1-difluoroprop-1-en-2-yl)-N,N-dimethylaniline, 3m** Flash column chromatography was done using 5% ethyl acetate/hexanes mixture. Product was obtained with 86% yield.  $^1\text{H}$  NMR (400 MHz, Chloroform-*d*)  $\delta$  7.31 (d,  $J = 8.5$  Hz, 2H), 6.77 (d,  $J = 8.8$  Hz, 2H), 3.01 (s, 6H), 1.99 (t,  $J = 3.4$  Hz, 3H).  $^{19}\text{F}$  NMR (376 MHz, Chloroform-*d*) AB system ( $\delta\text{A} = -88.90$ ,  $\delta\text{B} = -89.09$ ,  $^2J_{\text{F,F}} = 50.3$  Hz).  $^{13}\text{C}$  NMR (101 MHz, Chloroform-*d*)  $\delta$  153.18 (t,  $J = 286.3$  Hz), 149.48, 128.16 (t,  $J = 4.0$  Hz), 122.59, 112.31, 87.04 (dd,  $J = 18.8, 17.9$  Hz), 40.47, 13.21 (t,  $J = 1.7$  Hz). HRMS-ASAP+ ( $m/z$ ): calcd for  $\text{C}_{11}\text{H}_{14}\text{F}_2\text{N}$   $[\text{M}+\text{H}]^+$ : 198.1094, found: 198.1096

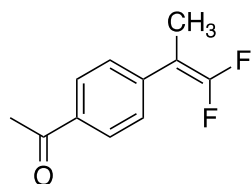

**1-(4-(1,1-difluoroprop-1-en-2-yl)phenyl)ethan-1-one, 3n** Flash column chromatography was done using 5% ethyl acetate/hexanes mixture. Product was obtained with 53% yield.  $^1\text{H}$  NMR (400 MHz, Chloroform-*d*)  $\delta$  8.00 – 7.93 (m, 1H), 7.52 – 7.45 (m, 1H), 2.62 (s, 2H), 2.03 (t,  $J = 3.4$  Hz, 1H).  $^{19}\text{F}$  NMR (376 MHz, Chloroform-*d*) ABX3 system ( $\delta\text{A} = -87.38$ ,  $\delta\text{B} = -87.98$ ,  $^2J_{\text{F,F}} = 37.2$  Hz,  $^4J_{\text{H,F}} = 3.0$  Hz).  $^{13}\text{C}$  NMR (101 MHz, Chloroform-*d*)  $\delta$  197.47, 153.89 (dd,  $J = 292.9, 288.0$  Hz), 139.80 (t,  $J = 4.7$  Hz), 135.61, 128.40, 127.52 (dd,  $J = 5.1, 3.4$  Hz), 87.28 (dd,  $J = 23.6, 13.3$  Hz), 26.56, 12.91 (t,  $J = 2.3$  Hz). HRMS-ASAP+ ( $m/z$ ): calcd for  $\text{C}_{11}\text{H}_{11}\text{F}_2\text{O}$   $[\text{M}+\text{H}]^+$ : 197.0778, found: 197.0781

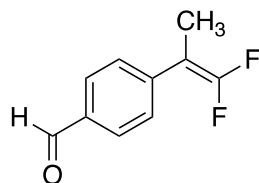

**4-(1,1-difluoroprop-1-en-2-yl)benzaldehyde, 3o** Flash column chromatography was done using 5% ethyl acetate/hexanes mixture. Product was obtained with 50% yield.  $^1\text{H}$  NMR (400 MHz, Chloroform-*d*)  $\delta$  10.03 (s, 1H), 7.95 – 7.82 (m, 2H), 7.60 – 7.51 (m, 2H), 2.05 (t,  $J = 3.4$  Hz, 3H).  $^{19}\text{F}$  NMR (376 MHz, Chloroform-*d*) ABX3 system ( $\delta\text{A} = -86.61$ ,  $\delta\text{B} = -87.34$ ,  $^2J_{\text{F,F}} = 35.6$  Hz,  $^4J_{\text{H,F}} = 3.0$  Hz).  $^{13}\text{C}$  NMR (101 MHz, Chloroform-*d*)  $\delta$  191.62, 154.02 (dd,  $J = 293.5, 288.5$  Hz), 141.26,

134.93, 129.73, 127.96 (dd,  $J = 5.3, 3.4$  Hz), 87.38 (t,  $J = 13.1, 23.6$  Hz), 12.91 (t,  $J = 1.7$  Hz).  
HRMS-ASAP+ (m/z): calcd for  $C_{10}H_9F_2O$  [M+H]<sup>+</sup>: 183.0621, found: 183.0621

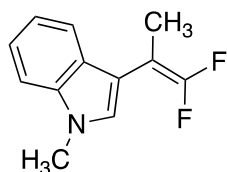

**3-(1,1-difluoroprop-1-en-2-yl)-1-methyl-1H-indole, 3p** Flash column chromatography was done using 5% ethyl acetate/hexanes mixture. Product was obtained with 85% yield. <sup>1</sup>H NMR (500 MHz, Chloroform-*d*)  $\delta$  7.71 (ddt,  $J = 8.0, 2.1, 1.0$  Hz, 1H), 7.37 (dt,  $J = 8.3, 1.0$  Hz, 1H), 7.31 (ddd,  $J = 8.2, 6.9, 1.2$  Hz, 1H), 7.20 (ddd,  $J = 8.0, 6.9, 1.1$  Hz, 1H), 7.08 (s, 1H), 3.82 (s, 3H), 2.11 (t,  $J = 3.3$  Hz, 3H). <sup>19</sup>F NMR (471 MHz, Chloroform-*d*) ABX3 system ( $\delta_A = -89.10$ ,  $\delta_B = -93.85$ ,  $^2J_{F,F} = 48.7$  Hz,  $^4J_{H,F} = 3.3$  Hz). <sup>13</sup>C NMR (126 MHz, Chloroform-*d*)  $\delta$  152.87 (dd,  $J = 286.7, 284.3$  Hz), 136.85, 127.47 (t,  $J = 4.1$  Hz), 126.31 (d,  $J = 2.4$  Hz), 121.89, 120.46 (d,  $J = 4.8$  Hz), 119.51, 109.44, 108.97 (dd,  $J = 4.4, 3.2$  Hz), 81.64 (dd,  $J = 25.5, 17.9$  Hz), 32.84, 14.19 (t,  $J = 2.7$  Hz).  
HRMS-ASAP+ (m/z): calcd for  $C_{12}H_{12}F_2N$  [M+H]<sup>+</sup>: 208.0938, found: 208.0930

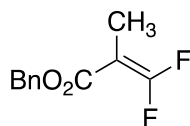

**benzyl 3,3-difluoro-2-methylacrylate, 3q** Flash column chromatography was done using 20% dichloromethane/hexanes mixture. Product was obtained with 85% yield. Spectral data matches the reported data in the literature.<sup>8</sup>

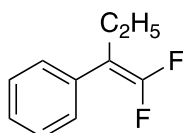

**(1,1-difluorobut-1-en-2-yl)benzene, 3r** The reaction was carried out at 95 °C for 10 days with a mixture of Z/E isomers (Z:E = 1: 0.84). Reaction progress was monitored by <sup>19</sup>F-NMR. The Z isomer of the starting material showed no conversion. The yield from the E isomer was determined by <sup>19</sup>F-NMR to be 91%. Spectral data matches the reported data in the literature.<sup>19</sup>

# NMR Assignment of compound 6

## <sup>1</sup>H-NMR: 2,2,6,6-tetramethyl-1-((1,1,1-trifluoro-2-phenylpropan-2-yl)oxy)piperidine, 6

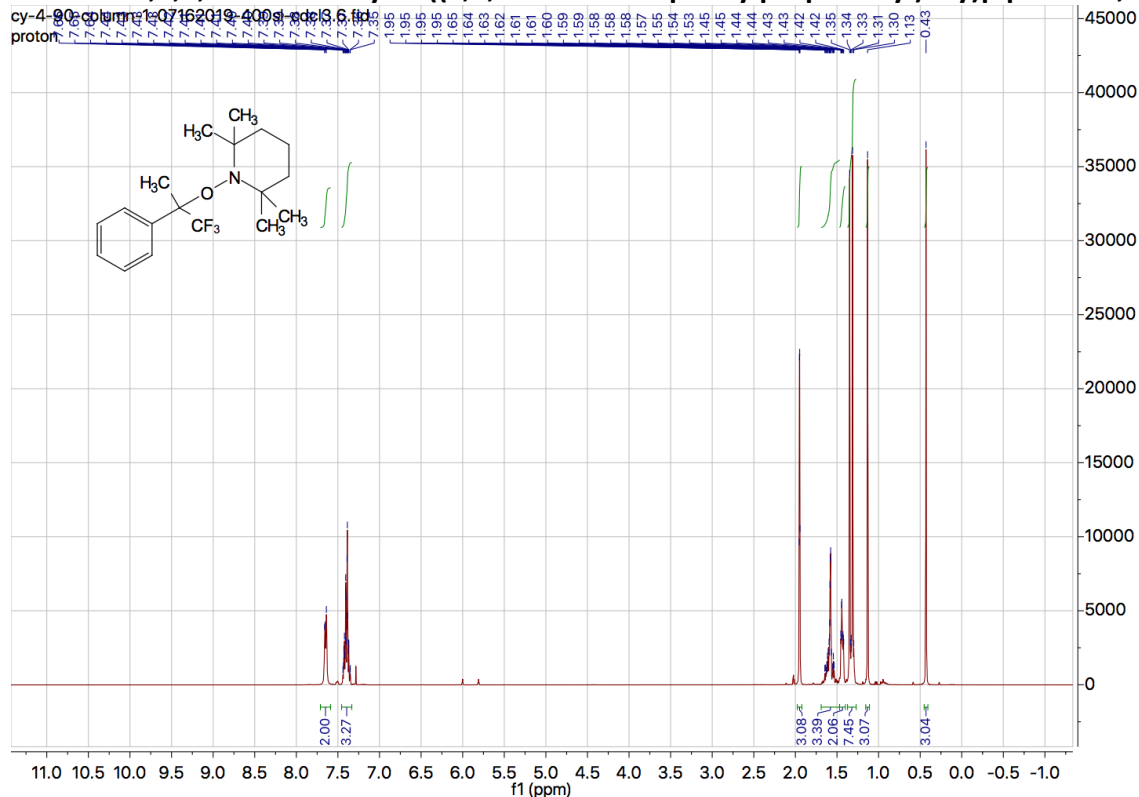

## <sup>13</sup>C-NMR: 2,2,6,6-tetramethyl-1-((1,1,1-trifluoro-2-phenylpropan-2-yl)oxy)piperidine, 6

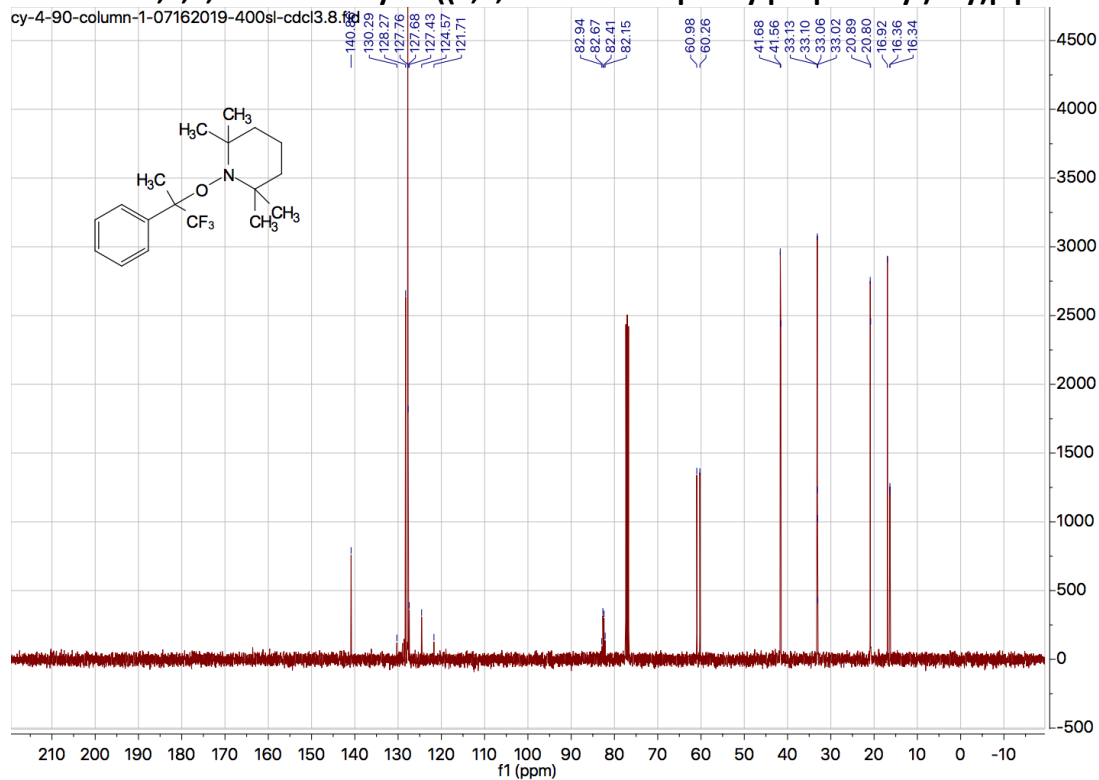

<sup>19</sup>F-NMR: 2,2,6,6-tetramethyl-1-((1,1,1-trifluoro-2-phenylpropan-2-yl)oxy)piperidine, 6

cy-4-90-column-1-07162019-400sl-cdcl3.7.fid

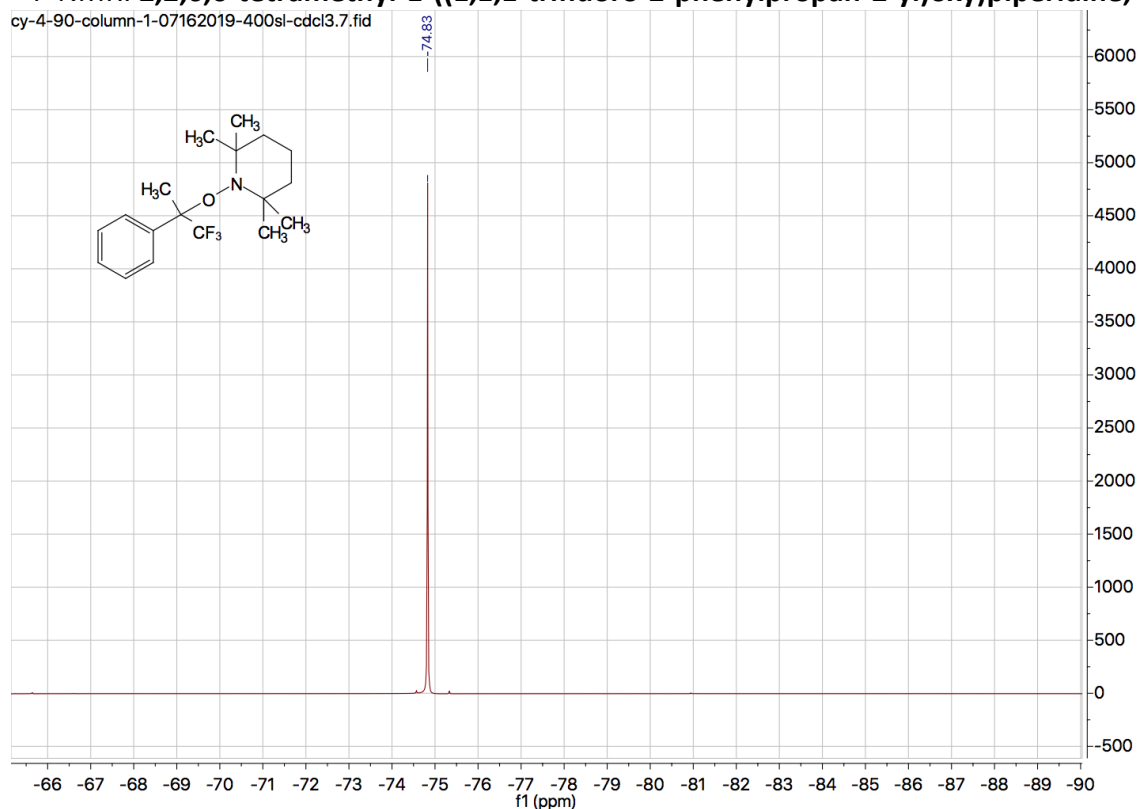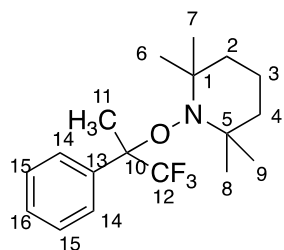

<sup>1</sup>H NMR (400 MHz, Chloroform-d)  $\delta$  7.68 – 7.62 (m, 2H, Ar-H), 7.46 – 7.34 (m, 3H, Ar-H), 1.95 (q,  $J$  = 1.2 Hz, 3H, H-11), 1.69 – 1.50 (m, 3H), 1.47 - 1.41 (m, 2H), 1.29 – 1.36 (m, 7H), 1.13 (s, 3H), 0.43 (s, 3H, H-6). <sup>13</sup>C NMR (101 MHz, Chloroform-d)  $\delta$  140.86 (C-13), 128.27 (Ar-C), 127.76 (Ar-C), 127.68 (Ar-C), 126.00 (q,  $J$  = 287.6 Hz, C-12), 82.54 (q,  $J$  = 26.4 Hz, C-10), 60.98 (C-1), 60.26 (C-5), 41.68 (C-2), 41.56 (C-4), 33.13 (C-3), 33.08 (q,  $J$  = 4.1 Hz, C-6), 20.89 (C-7), 20.80 (C-8), 16.92 (C-9), 16.35 (q,  $J$  = 1.7 Hz, C-11). <sup>19</sup>F NMR (376 MHz, Chloroform-d)  $\delta$  -74.83.

### HMBC spectrum of compound 6

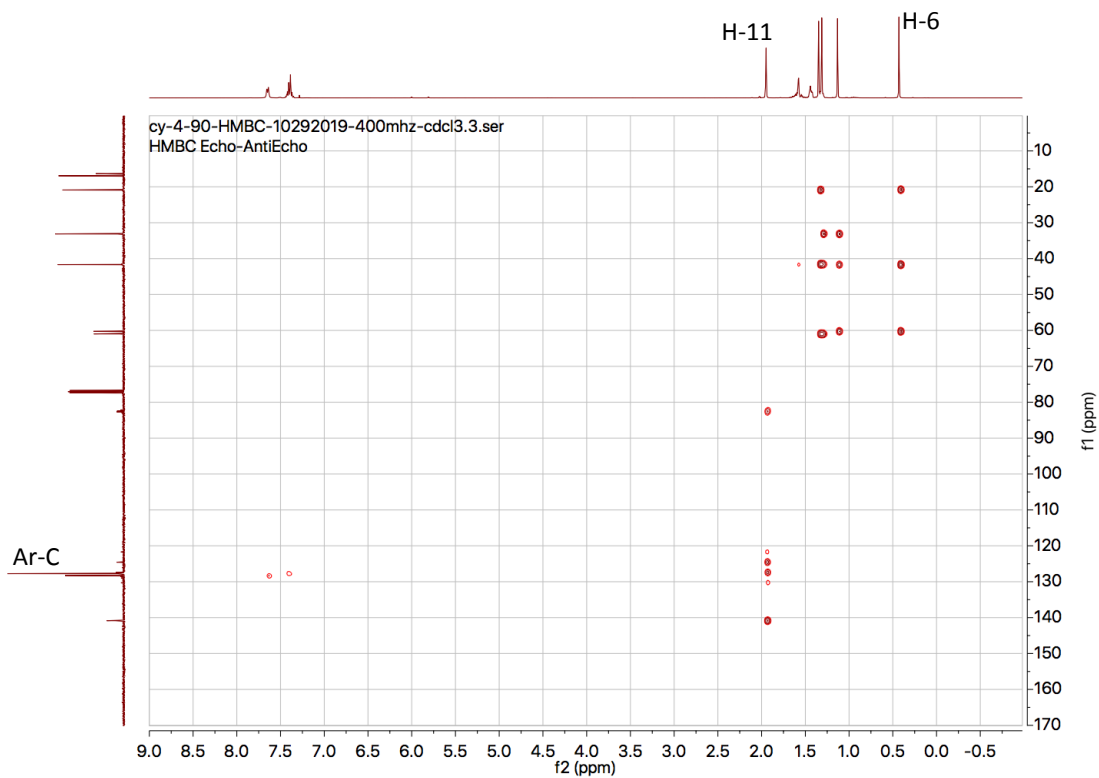

### Zoom-in HMBC spectrum of compound 6

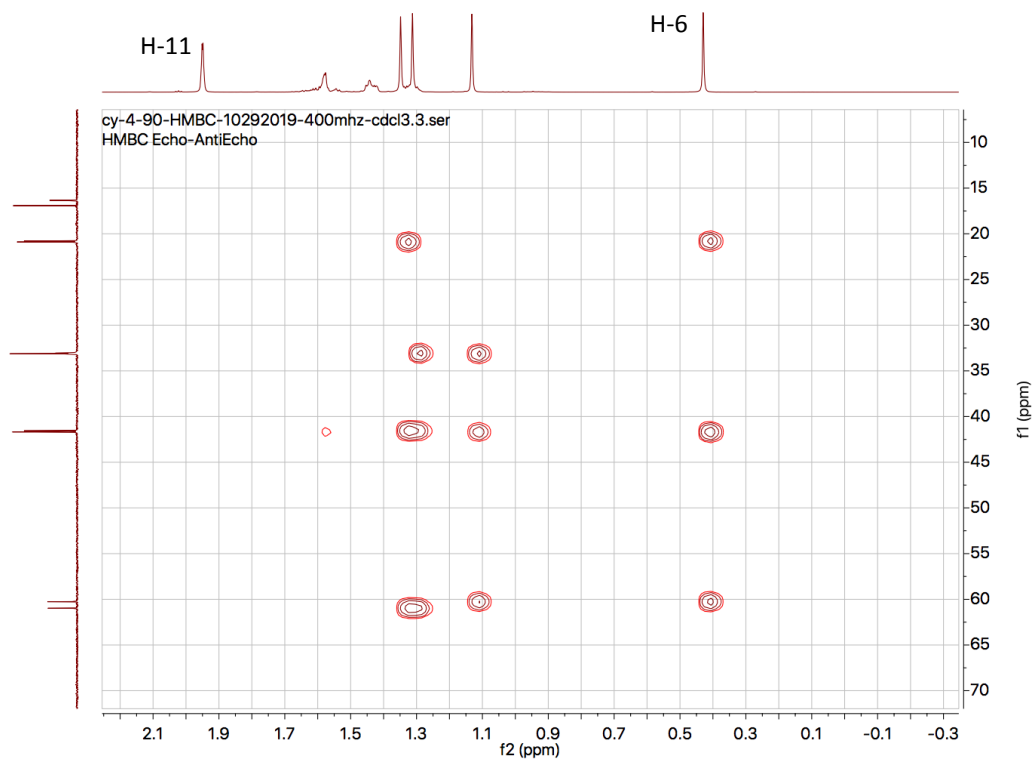

### HSQC spectrum of compound 6

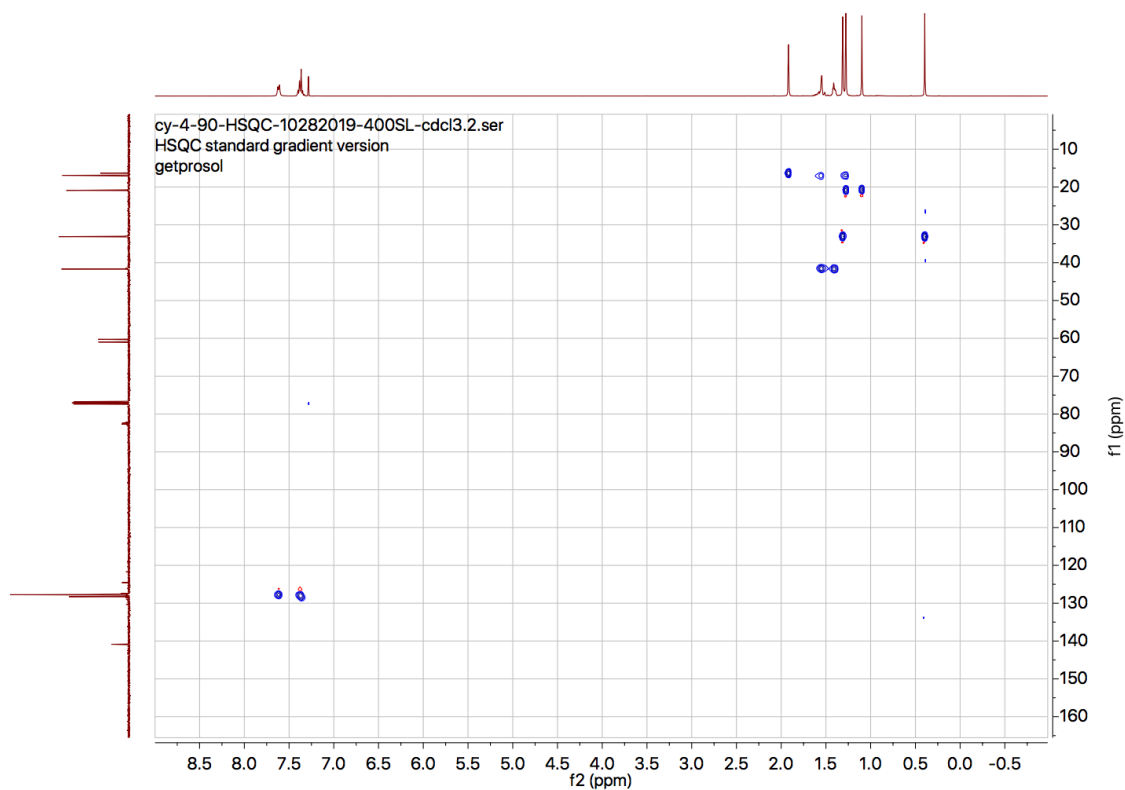

### Zoom-in HSQC spectrum of compound 6

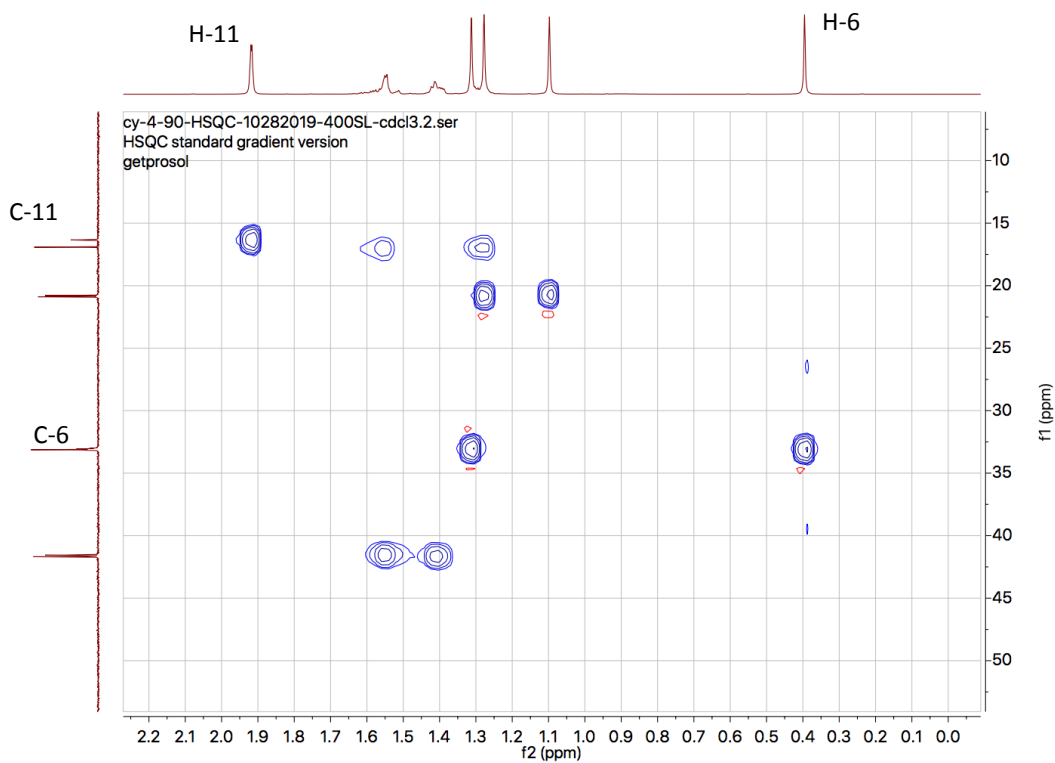

# NMR Spectra

## <sup>1</sup>H-NMR: (4-(1,1-difluoroprop-1-en-2-yl)phenyl)(methyl)sulfane, 3c

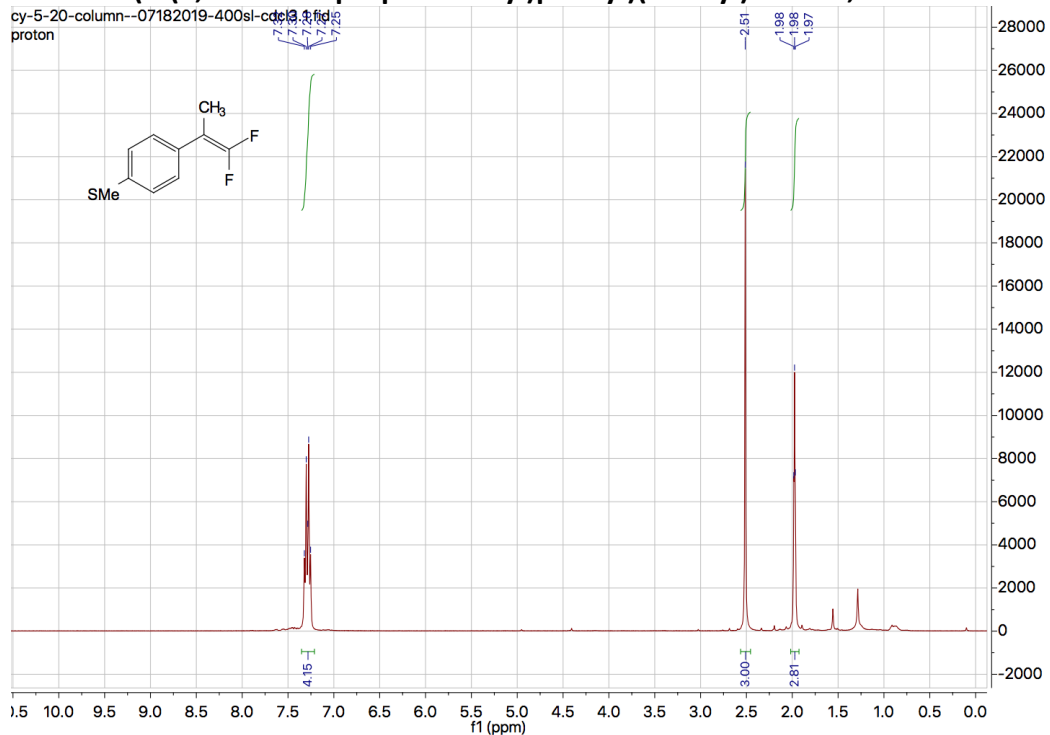

## <sup>13</sup>C-NMR: (4-(1,1-difluoroprop-1-en-2-yl)phenyl)(methyl)sulfane, 3c

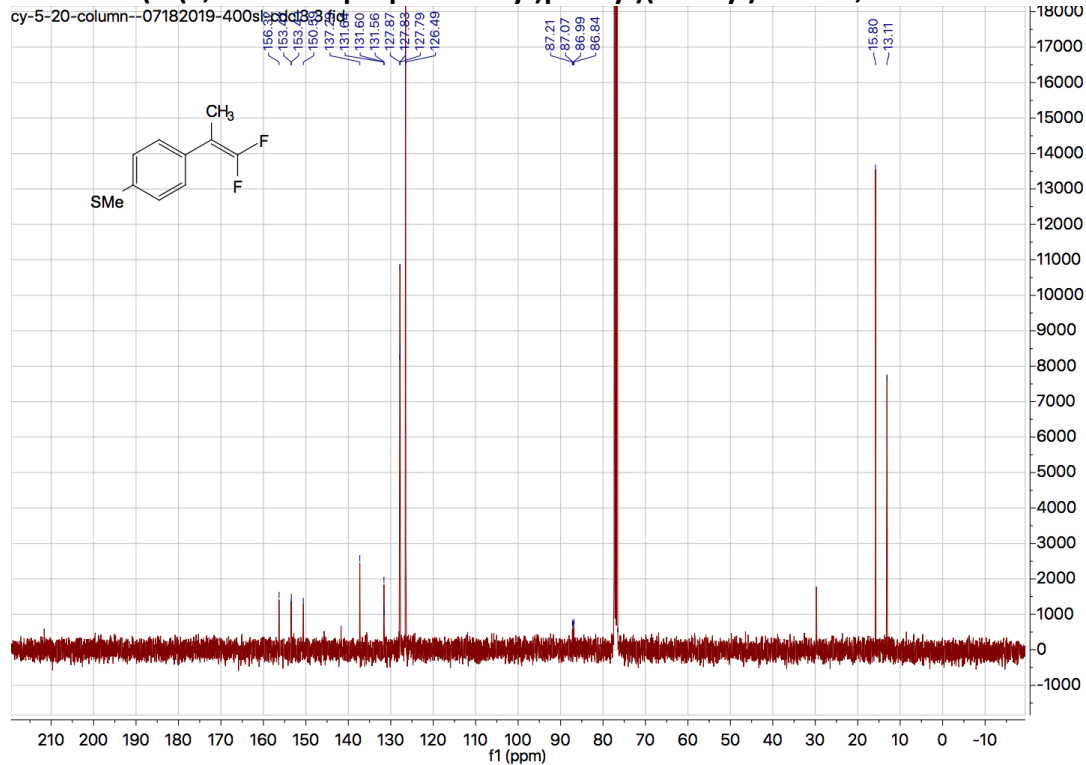

**<sup>19</sup>F-NMR: (4-(1,1-difluorprop-1-en-2-yl)phenyl)(methyl)sulfane, 3c**

cy-5-20-column--07182019-400sl-cdcl3.2.fid  
F19

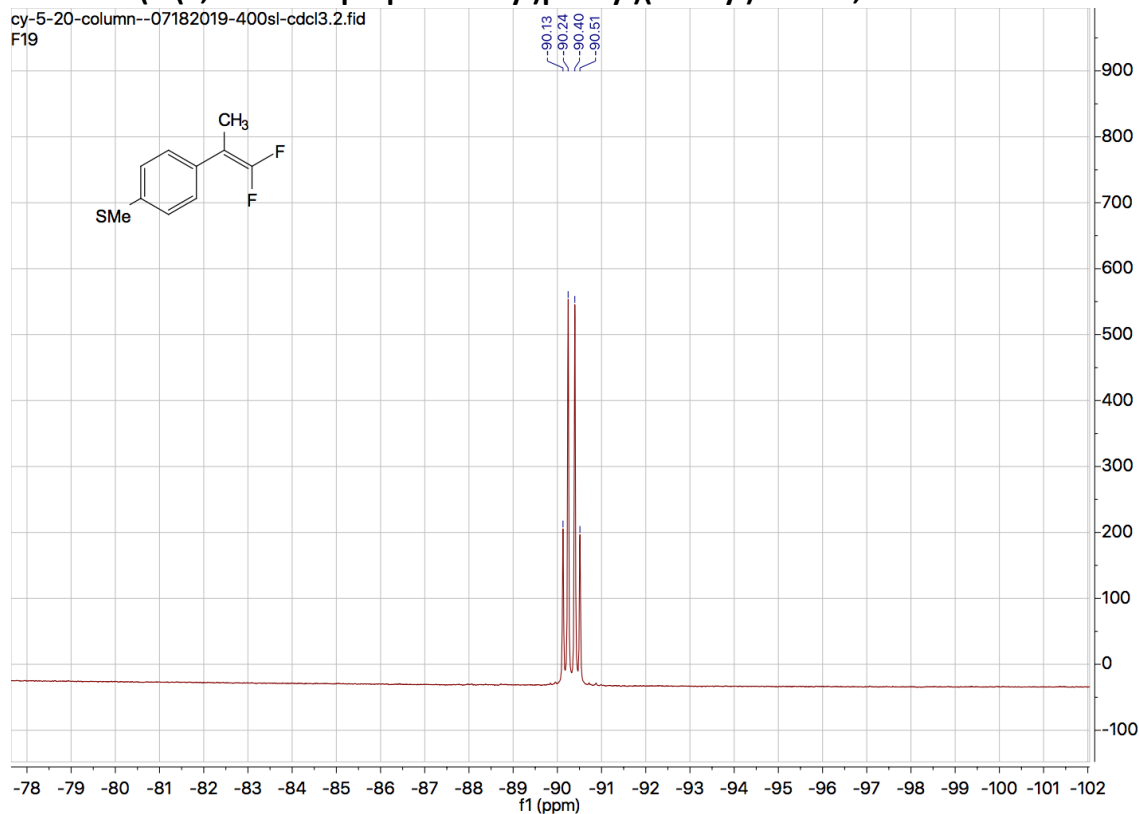

**<sup>1</sup>H-NMR: 1-(1,1-difluorprop-1-en-2-yl)-3,5-dimethoxybenzene, 3d**

cy-5-21-column--07192019-400sl-cdcl3.4.fid  
proton

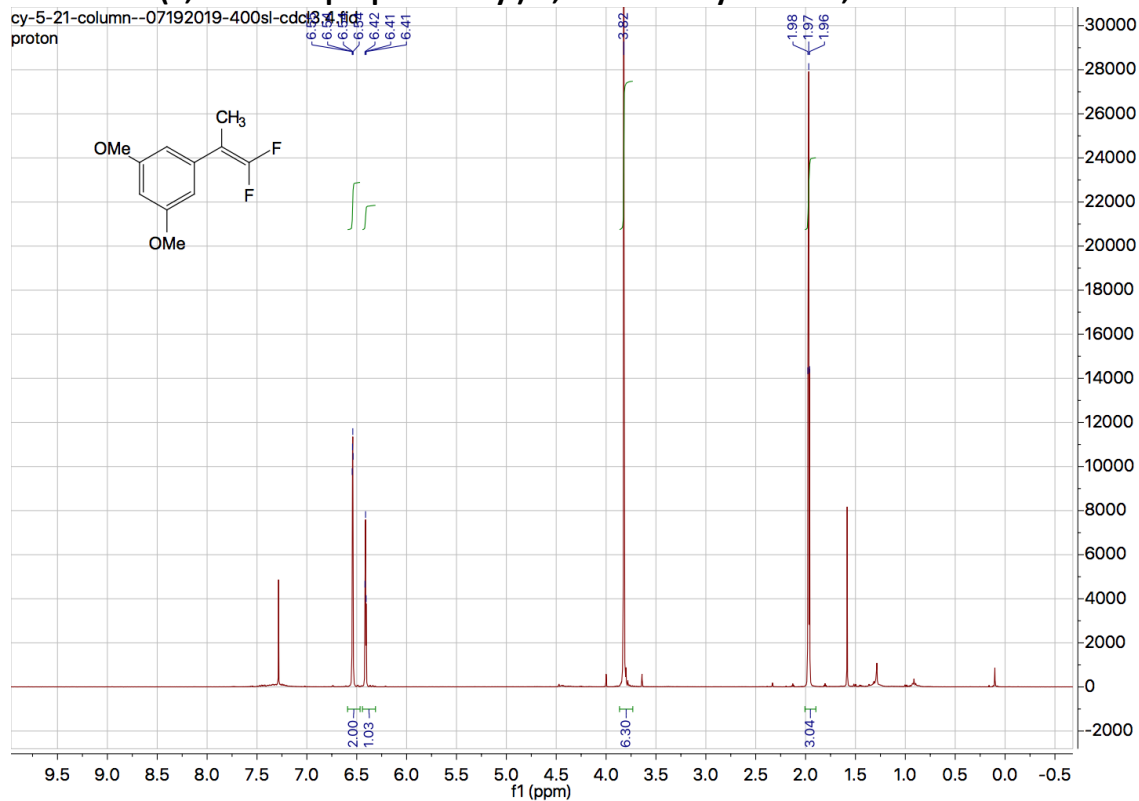



**<sup>13</sup>C-NMR: 1-(1,1-difluoroprop-1-en-2-yl)-3,5-dimethoxybenzene, 3d**

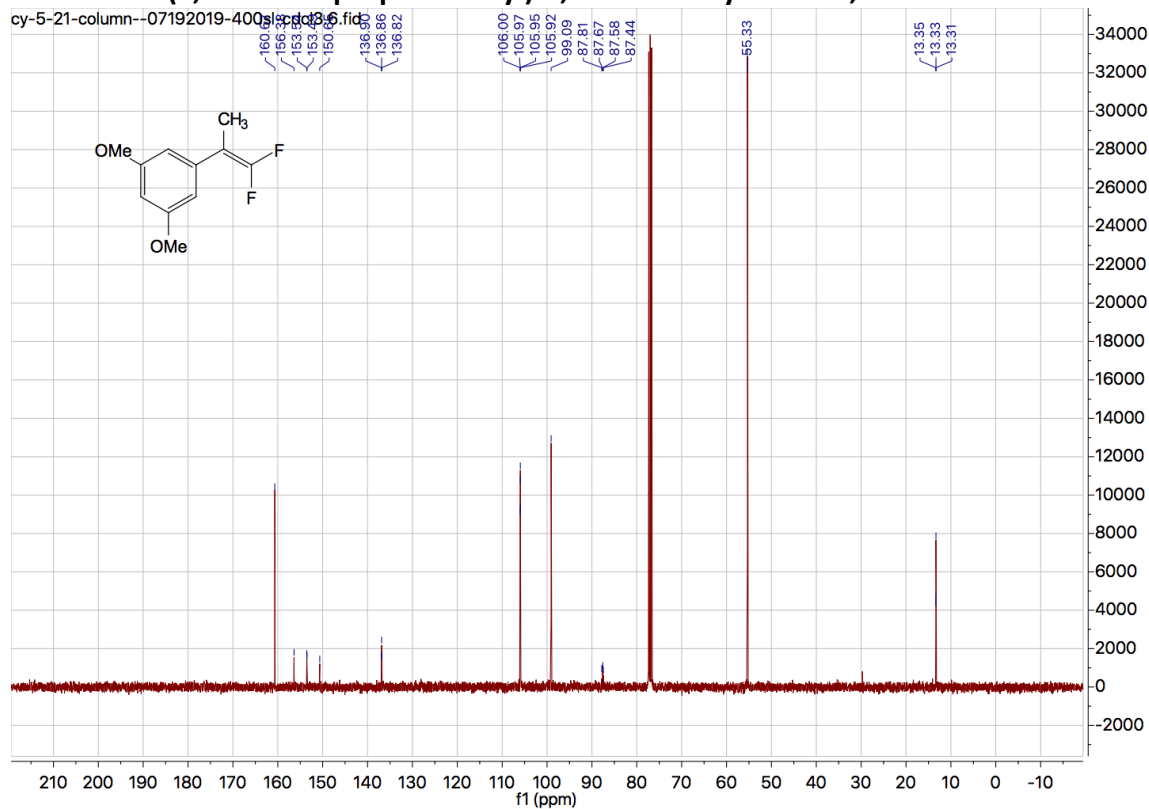

**<sup>19</sup>F-NMR: 1-(1,1-difluoroprop-1-en-2-yl)-3,5-dimethoxybenzene, 3d**

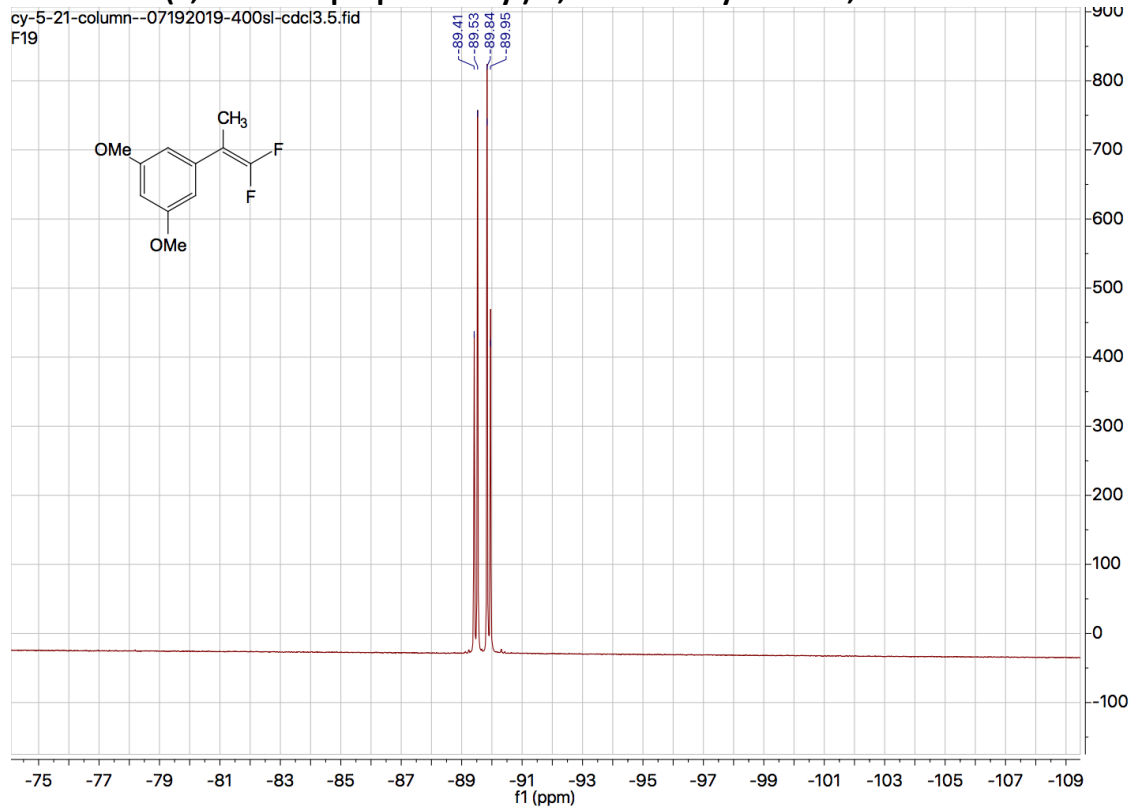

### <sup>1</sup>H-NMR: 4-(1,1-difluoroprop-1-en-2-yl)-N-methylbenzamide, 3e

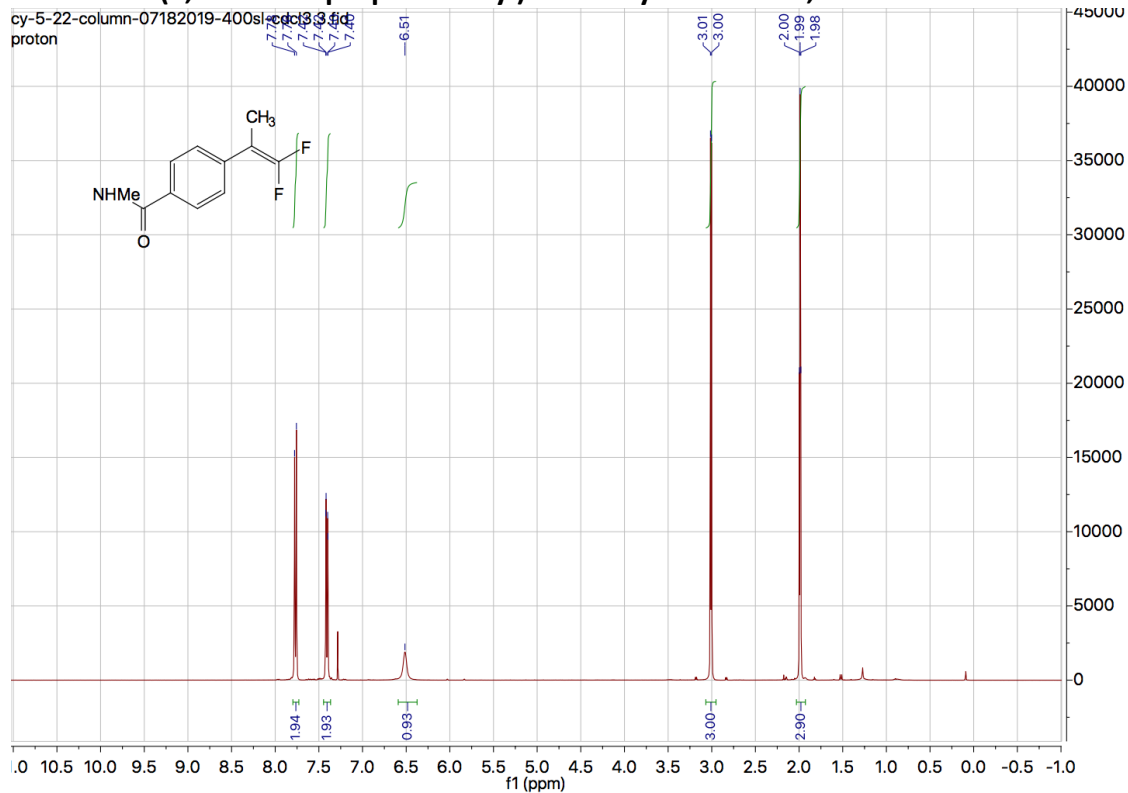

### <sup>13</sup>C-NMR: 4-(1,1-difluoroprop-1-en-2-yl)-N-methylbenzamide, 3e

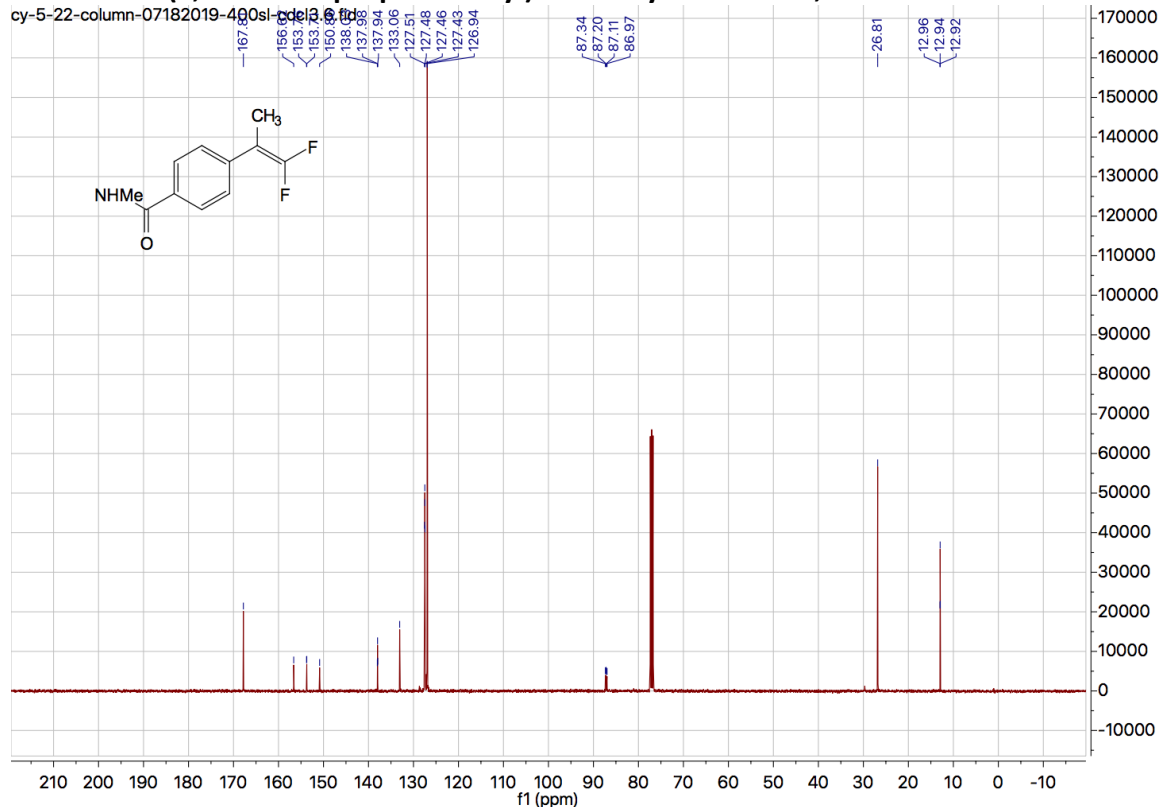

**<sup>19</sup>F-NMR: 4-(1,1-difluoroprop-1-en-2-yl)-N-methylbenzamide, 3e**

cy-5-22-column-07182019-400sl-cdcl3.4.fid  
F19

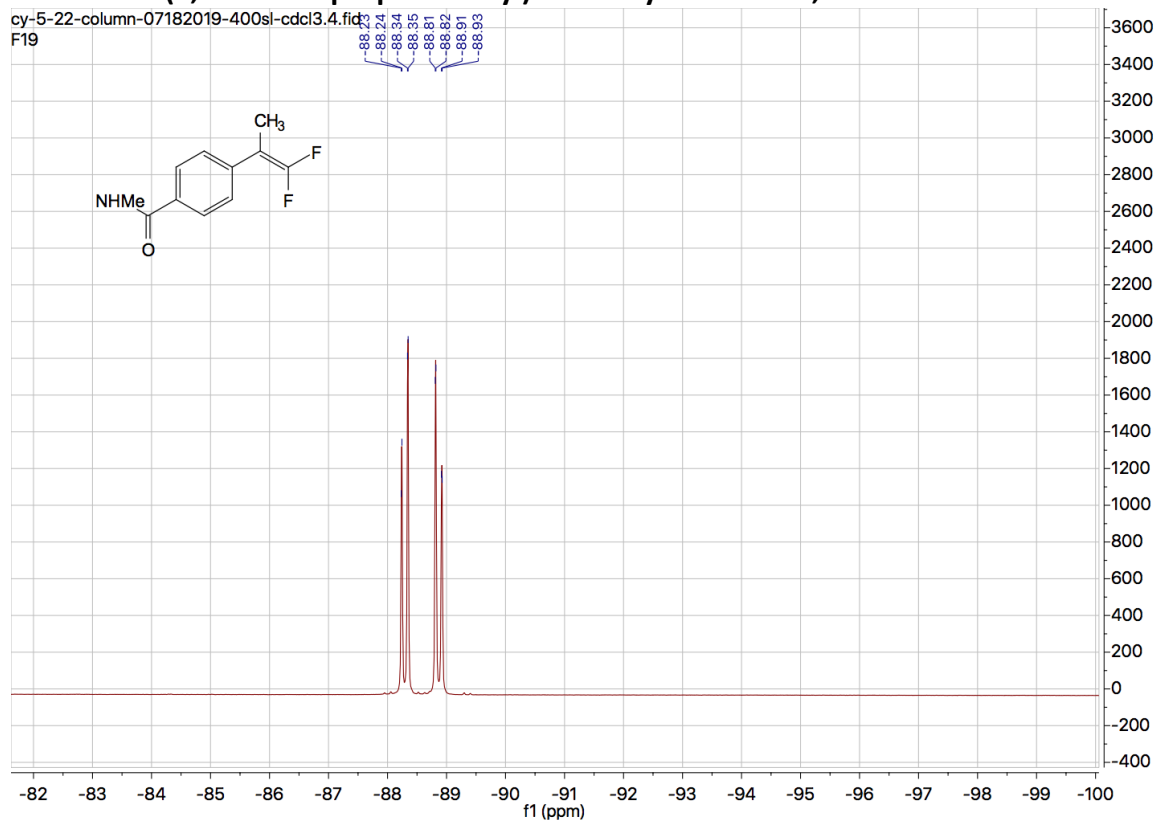

**<sup>1</sup>H-NMR: 4-(1,1-difluoroprop-1-en-2-yl)benzoic acid, 3f**

cy-5-25-column--08022019-400sl-c6d6.1.fid  
proton

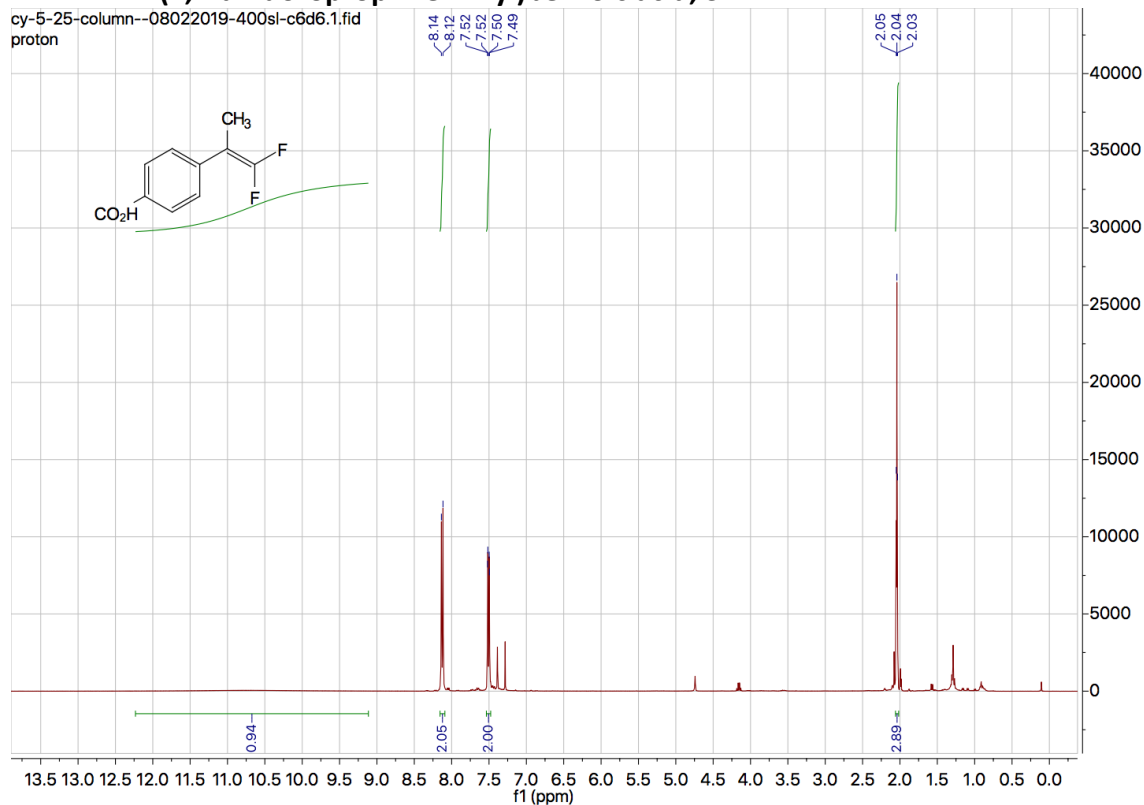

### <sup>13</sup>C-NMR: 4-(1,1-difluoroprop-1-en-2-yl)benzoic acid, 3f

cy-5-25-column--08022019-400sl-c6d6.3.fid

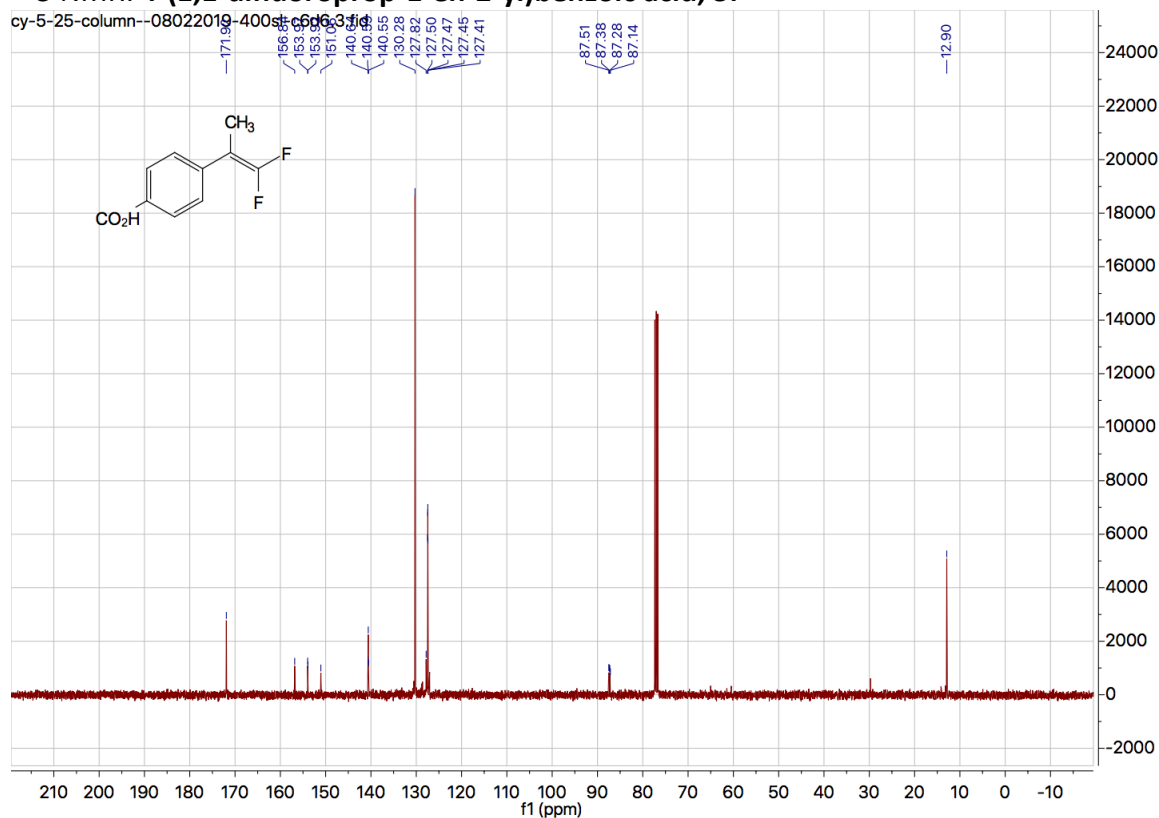

### <sup>19</sup>F-NMR: 4-(1,1-difluoroprop-1-en-2-yl)benzoic acid, 3f

cy-5-25-column--08022019-400sl-c6d6.2.fid  
F19

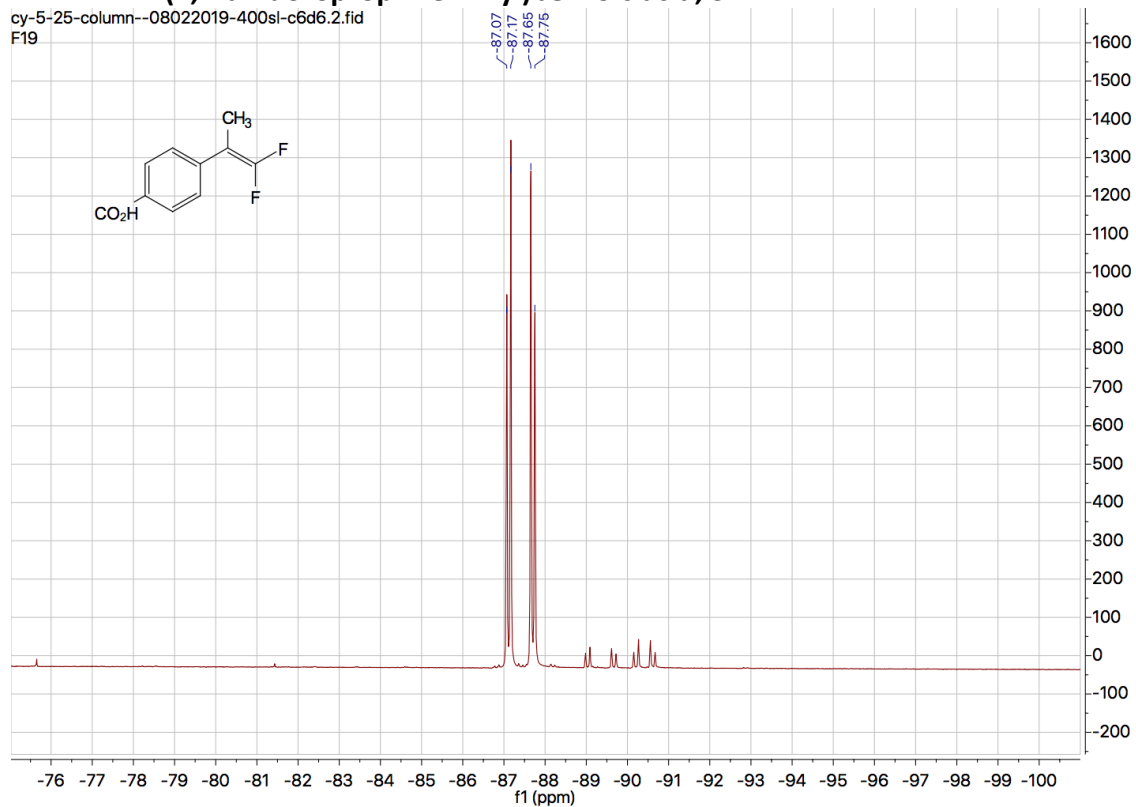

# <sup>1</sup>H-NMR: 3-(1,1-difluoroprop-1-en-2-yl)quinoline, 3g

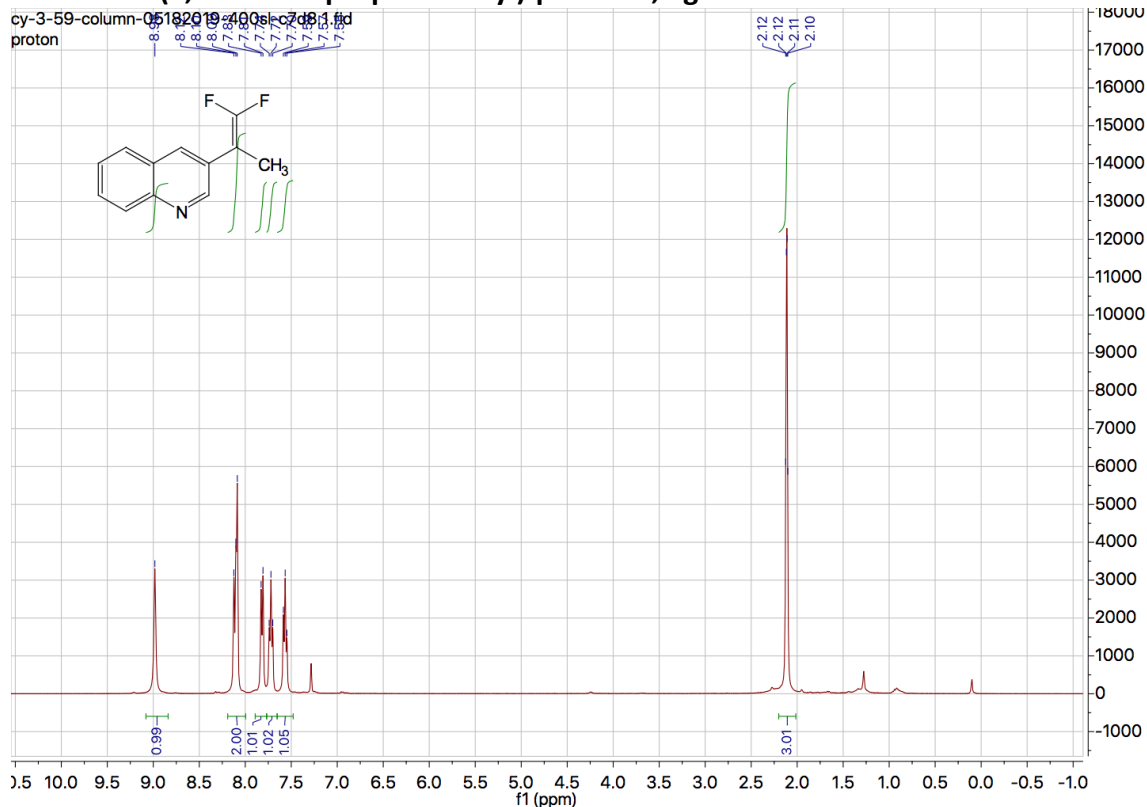

# <sup>13</sup>C-NMR: 3-(1,1-difluoroprop-1-en-2-yl)quinoline, 3g

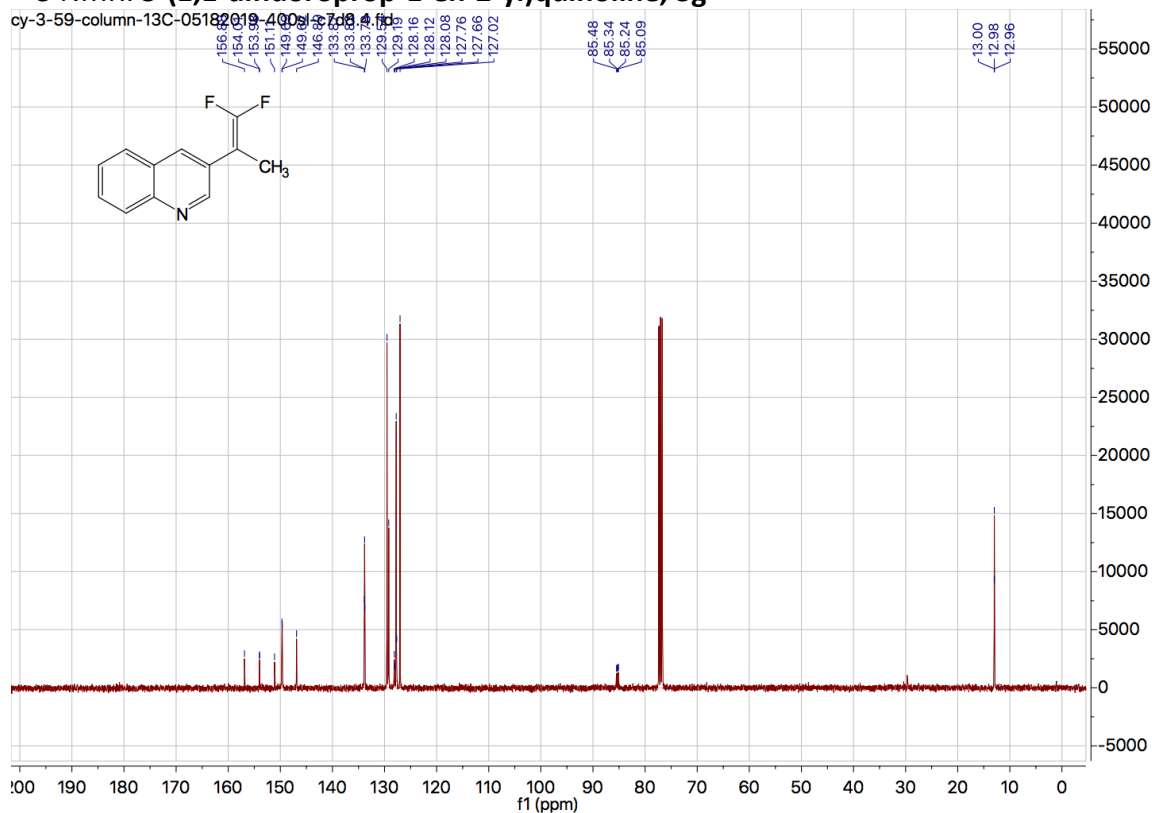

### <sup>19</sup>F-NMR: 3-(1,1-difluoroprop-1-en-2-yl)quinoline, 3g

cy-3-59-column-19F-05182019-400sl-c7d8.2.fid  
F19

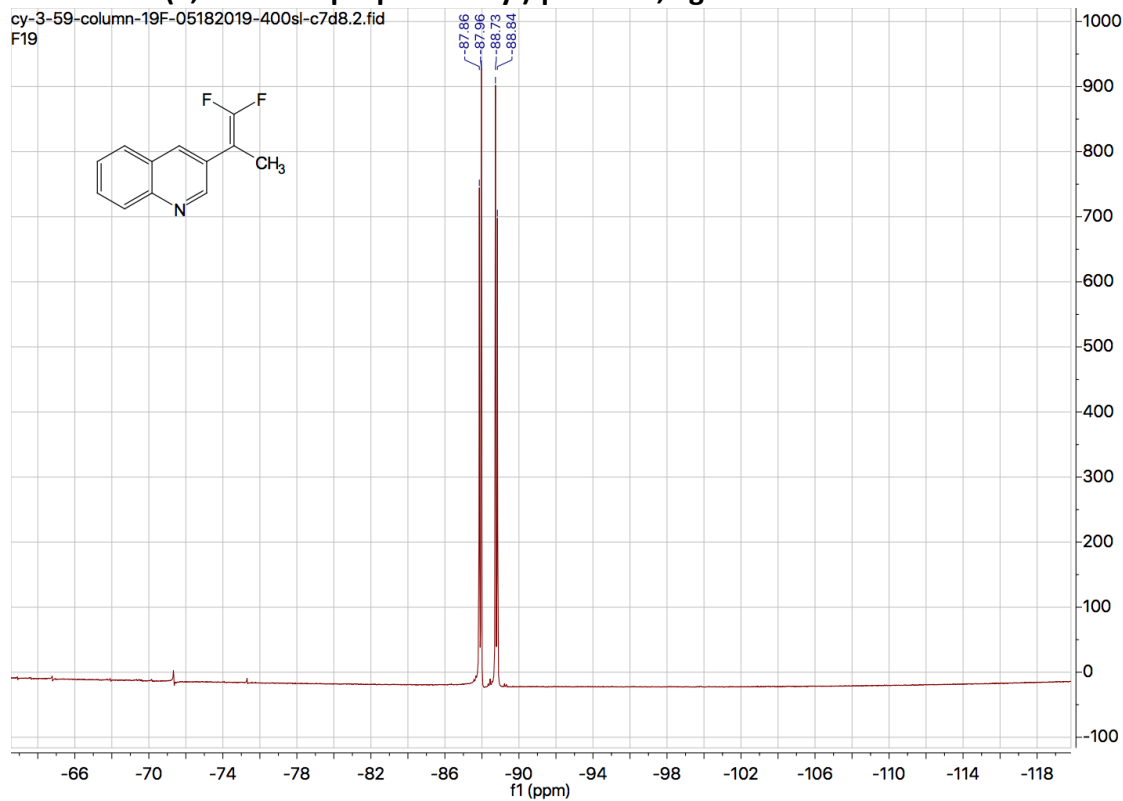

### <sup>1</sup>H-NMR: 1-(1,1-difluoroprop-1-en-2-yl)-3-fluorobenzene, 3l

cy-6-22-column-1H-10232019-400SL-cdcl3.1.fid  
proton

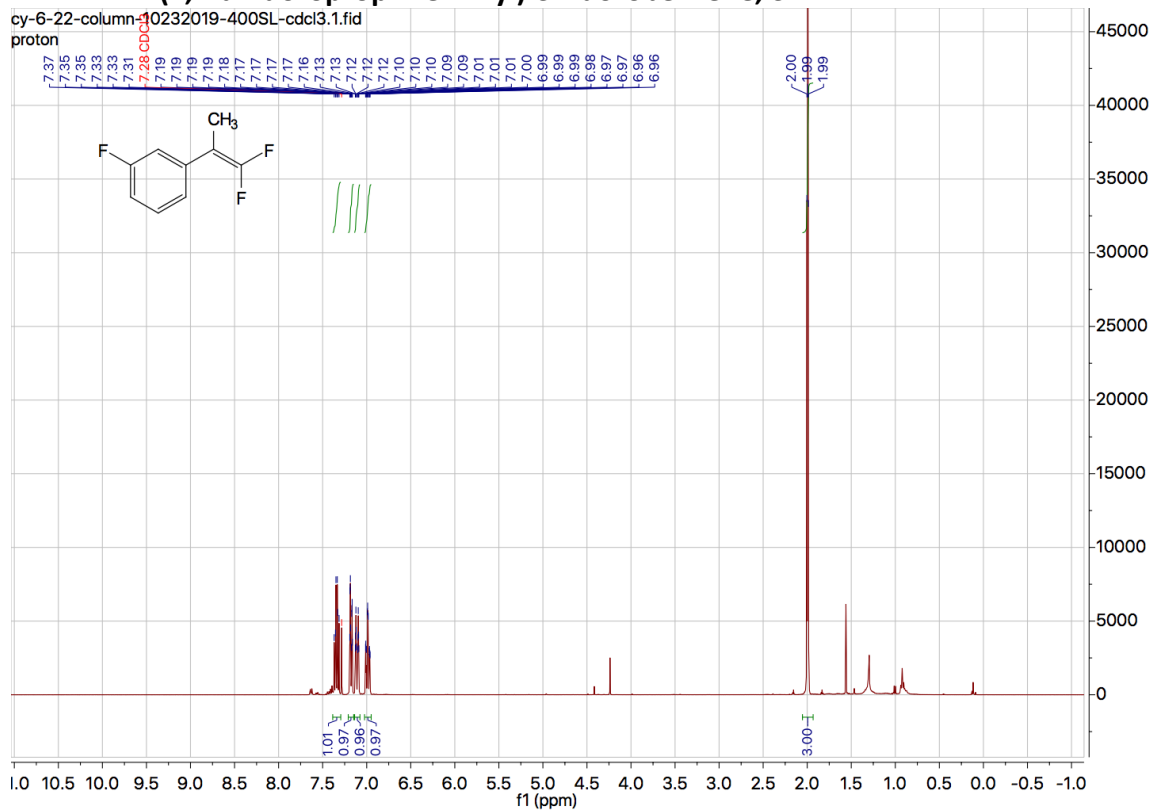



### <sup>1</sup>H-NMR: 4-(1,1-difluoroprop-1-en-2-yl)-N,N-dimethylaniline, 3m

cy-6-23-column-10272019-400SL-cdcl3.1.fid  
proton

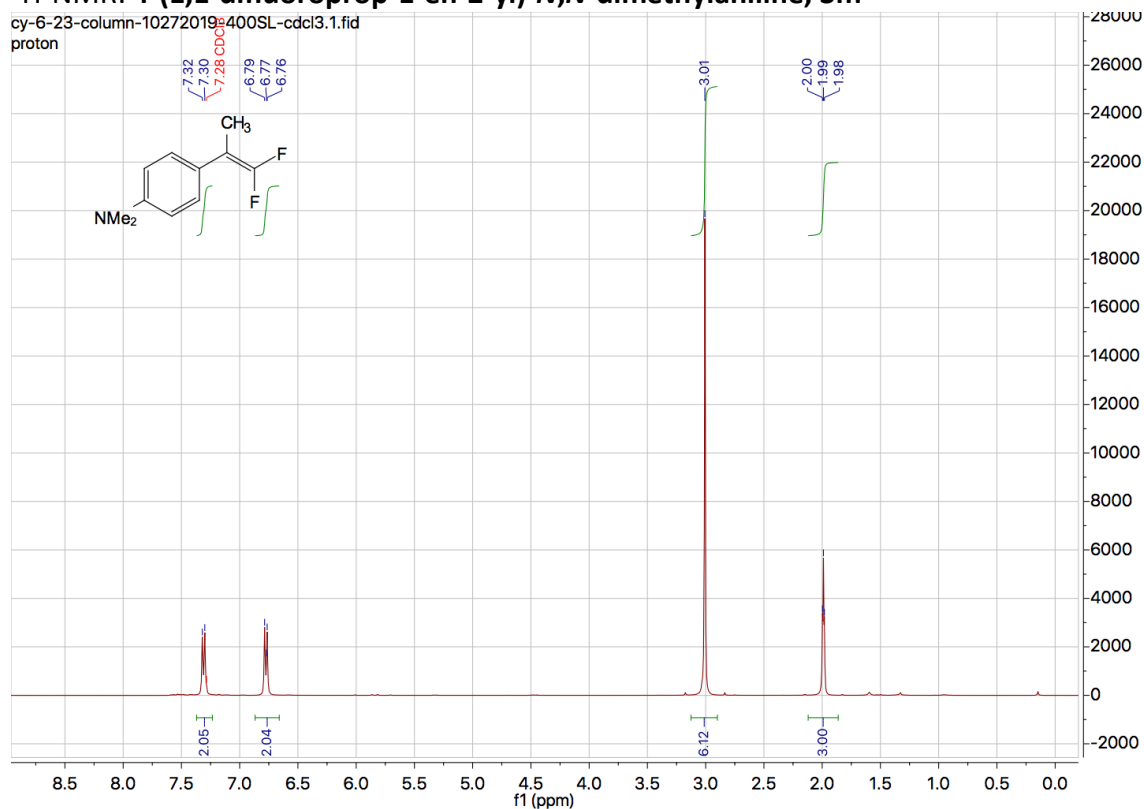

### <sup>13</sup>C-NMR: 4-(1,1-difluoroprop-1-en-2-yl)-N,N-dimethylaniline, 3m

cy-6-23-column-10272019-400SL-cdcl3.3.fid

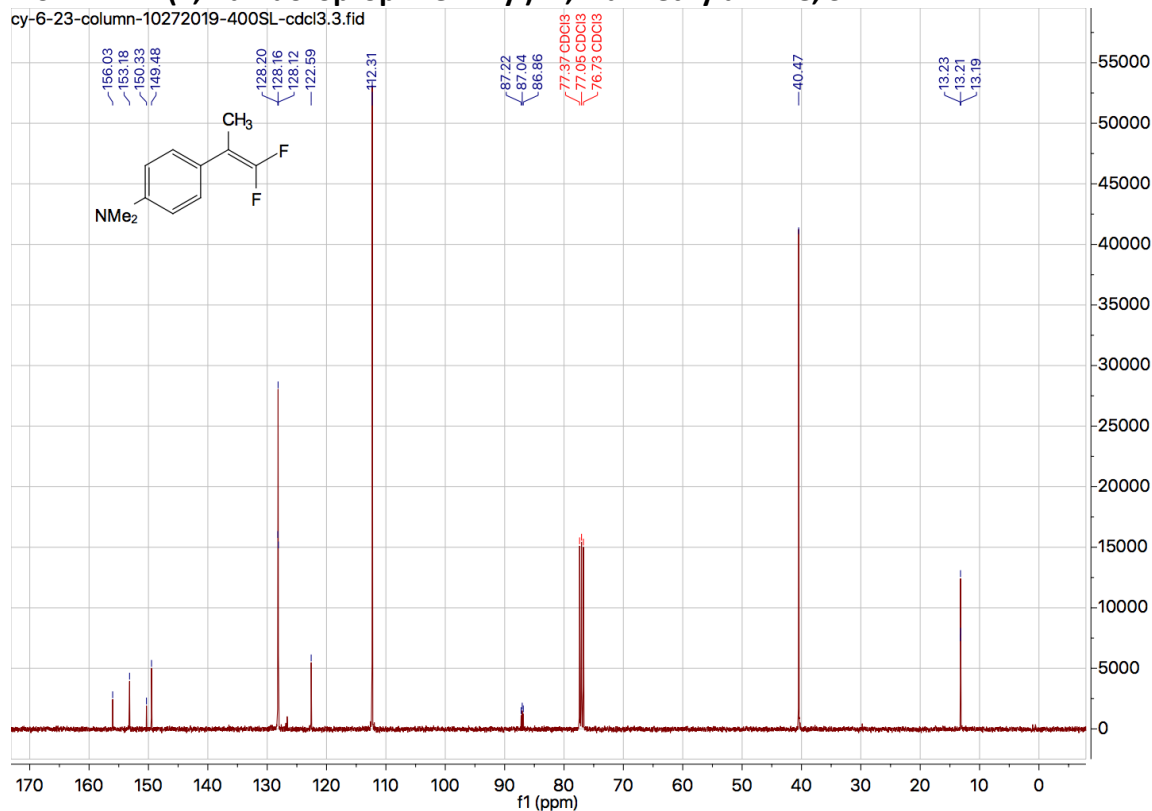



**<sup>19</sup>F-NMR: 4-(1,1-difluoroprop-1-en-2-yl)-N,N-dimethylaniline, 3m**

cy-6-23-10272019-400SL-c6d6.9.fid  
F19

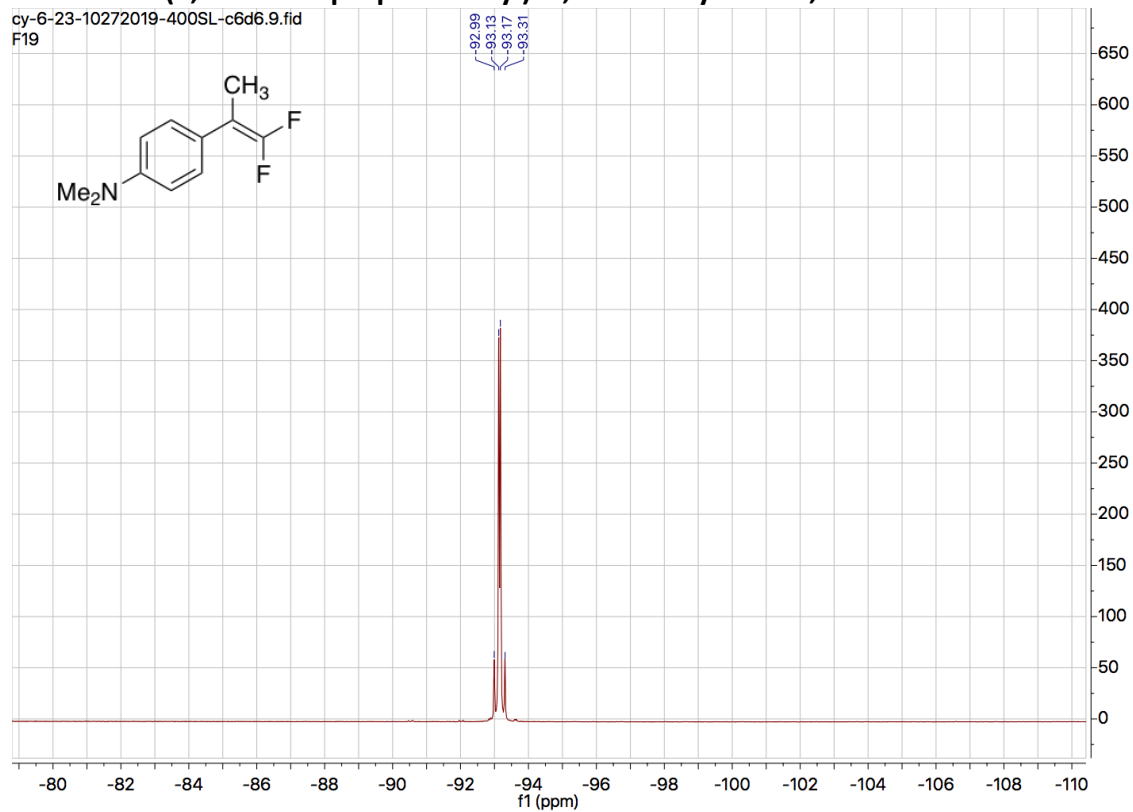

**<sup>1</sup>H-NMR: 1-(4-(1,1-difluoroprop-1-en-2-yl)phenyl)ethan-1-one, 3n**

cy-6-24-column-10272019-400SL-cdcl3.11.fid  
proton

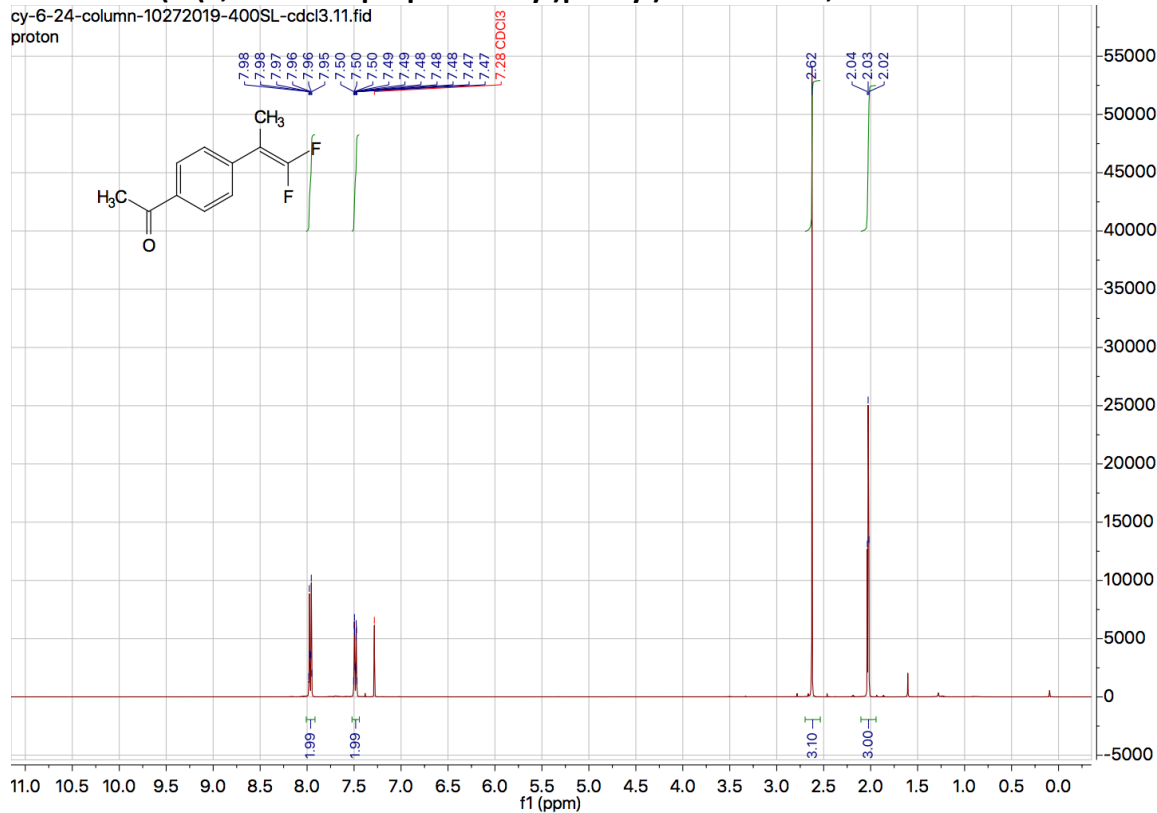

**<sup>13</sup>C-NMR: 1-(4-(1,1-difluoroprop-1-en-2-yl)phenyl)ethan-1-one, 3n**

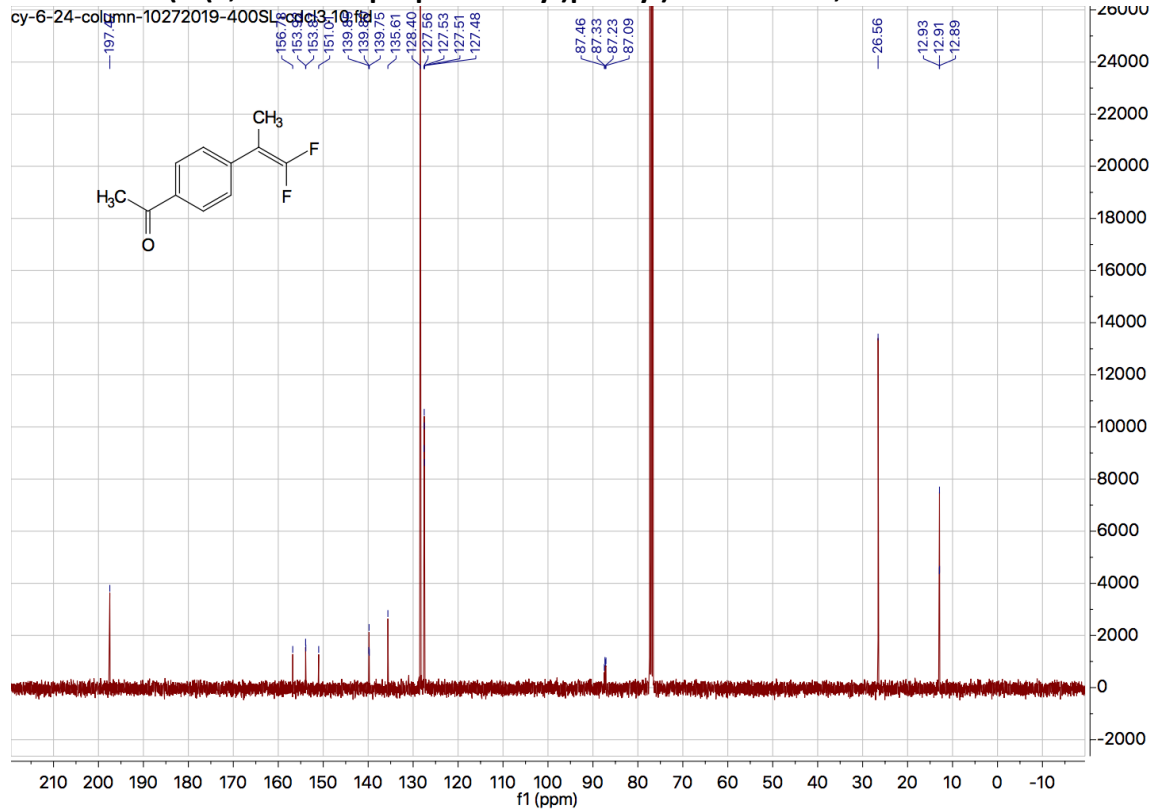

**<sup>19</sup>F-NMR: 1-(4-(1,1-difluoroprop-1-en-2-yl)phenyl)ethan-1-one, 3n**

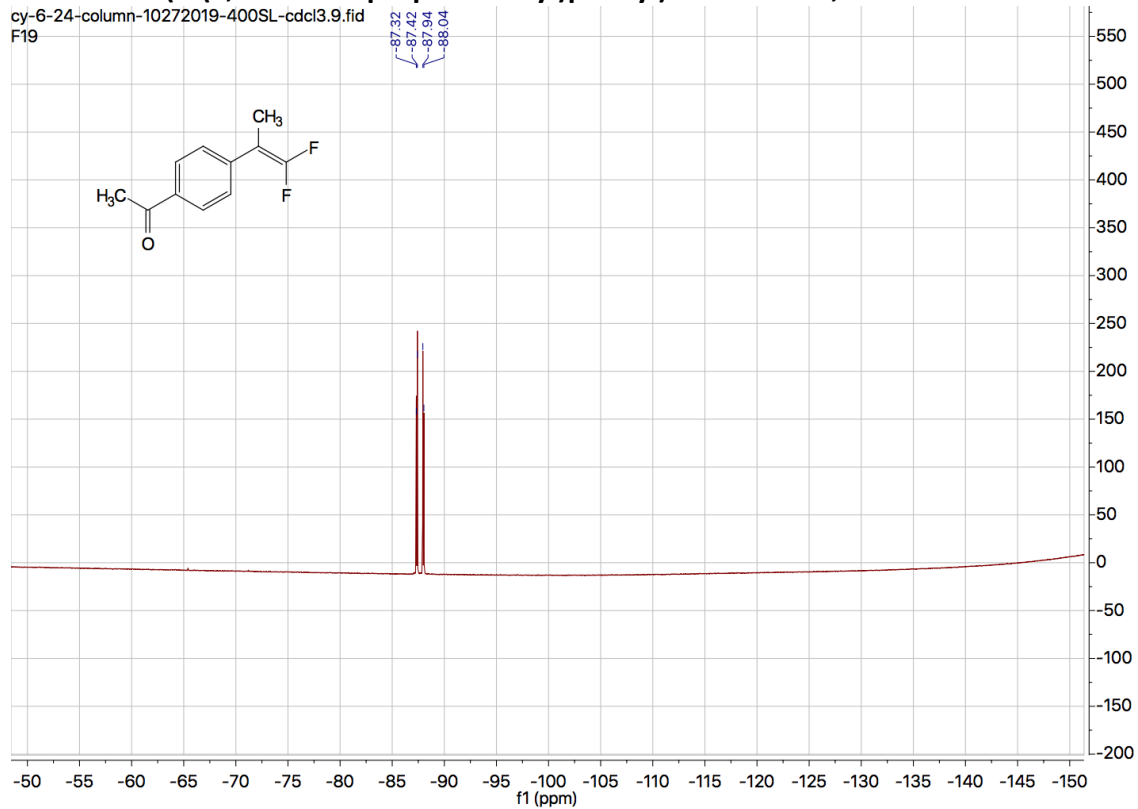

# <sup>1</sup>H-NMR: 4-(1,1-difluoroprop-1-en-2-yl)benzaldehyde, 3o

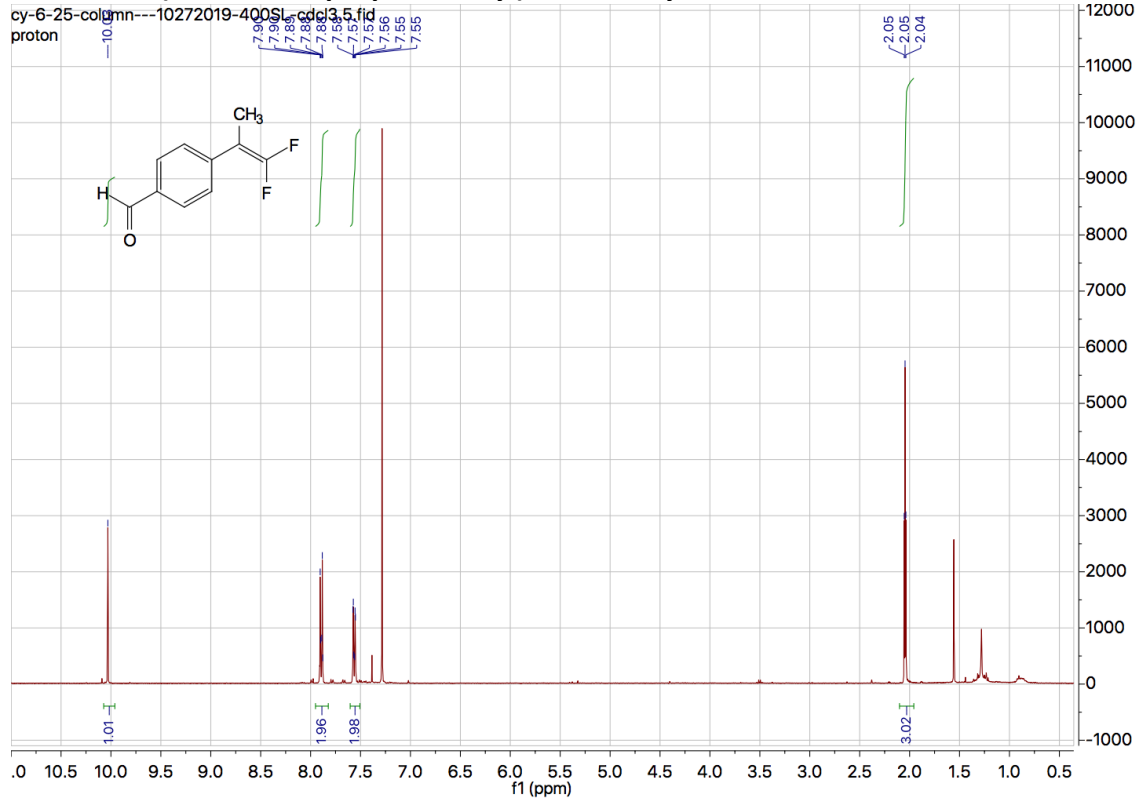

# <sup>13</sup>C-NMR: 4-(1,1-difluoroprop-1-en-2-yl)benzaldehyde, 3o

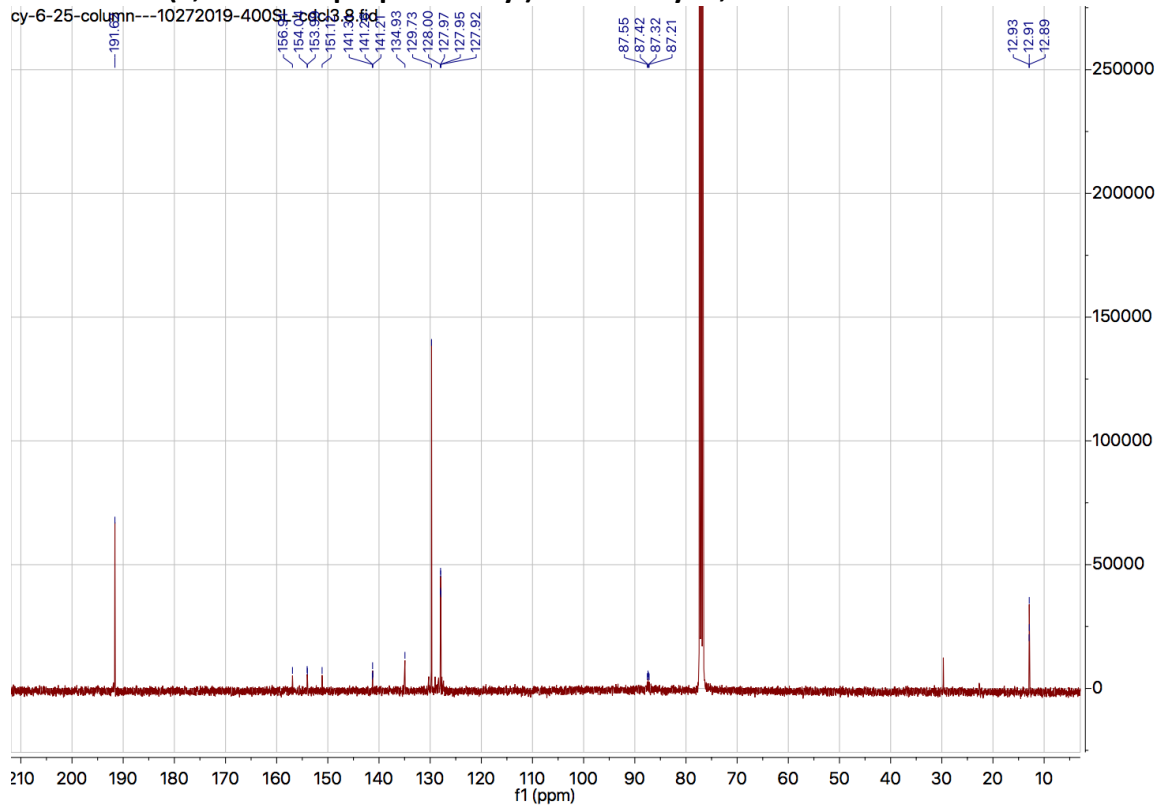

**<sup>19</sup>F-NMR: 4-(1,1-difluoroprop-1-en-2-yl)benzaldehyde, 3o**

cy-6-25-column---10272019-400SL-cdcl3.6.fid  
F19

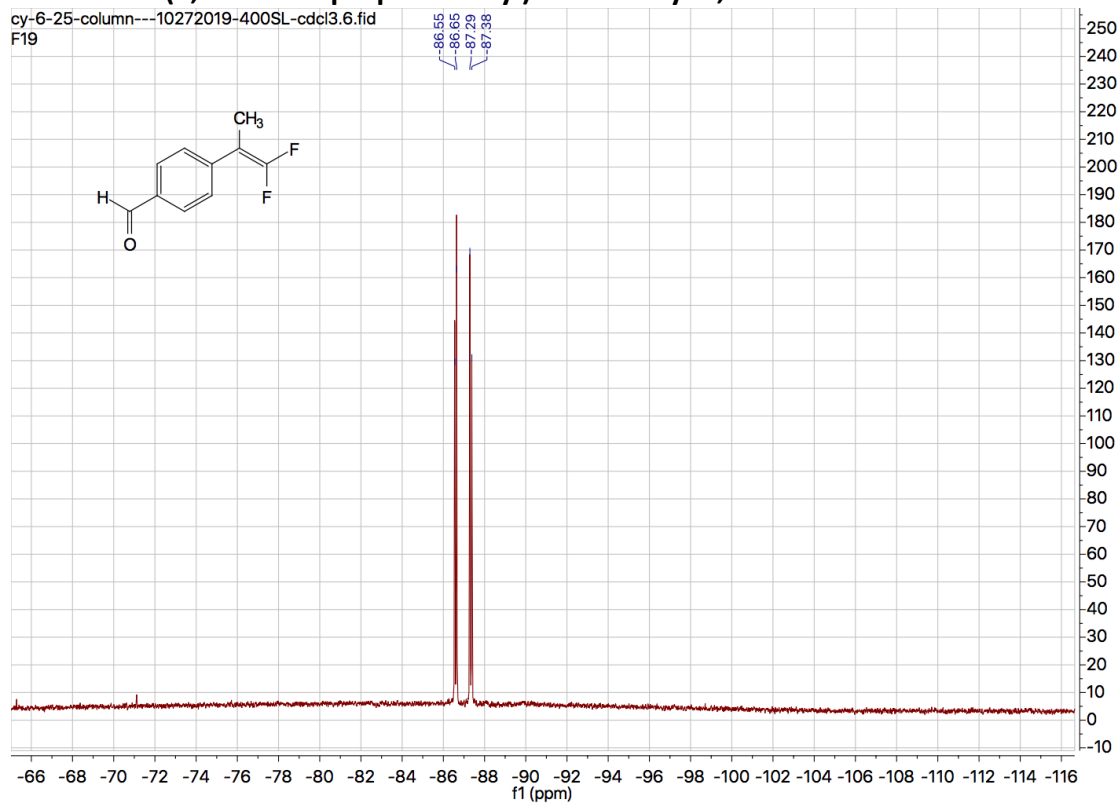

**<sup>1</sup>H-NMR: 3-(1,1-difluoroprop-1-en-2-yl)-1-methyl-1H-indole, 3p**

cy-6-38-column-11242019-500ml-cdcl3.9.fid  
Proton

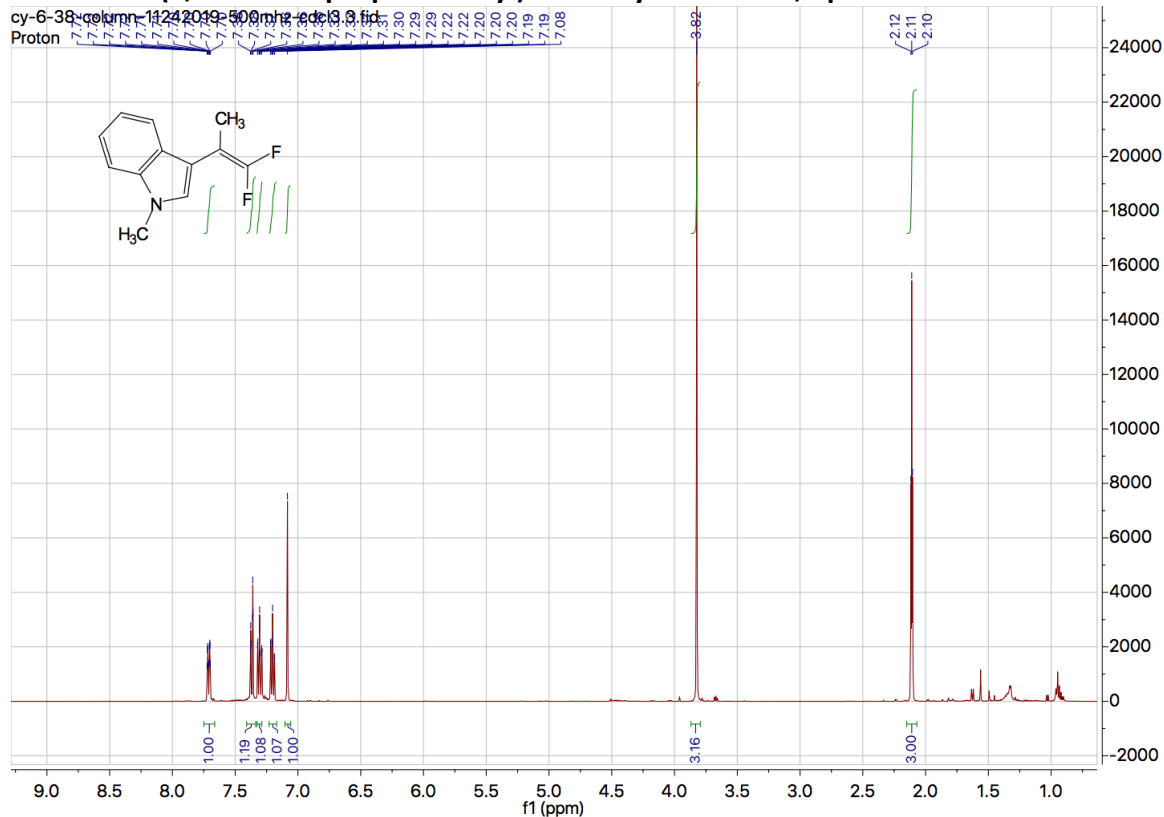



**<sup>1</sup>H-NMR: 2,2,6,6-tetramethyl-1-((1,1,1-trifluoro-2-phenylpropan-2-yl)oxy)piperidine, 6**

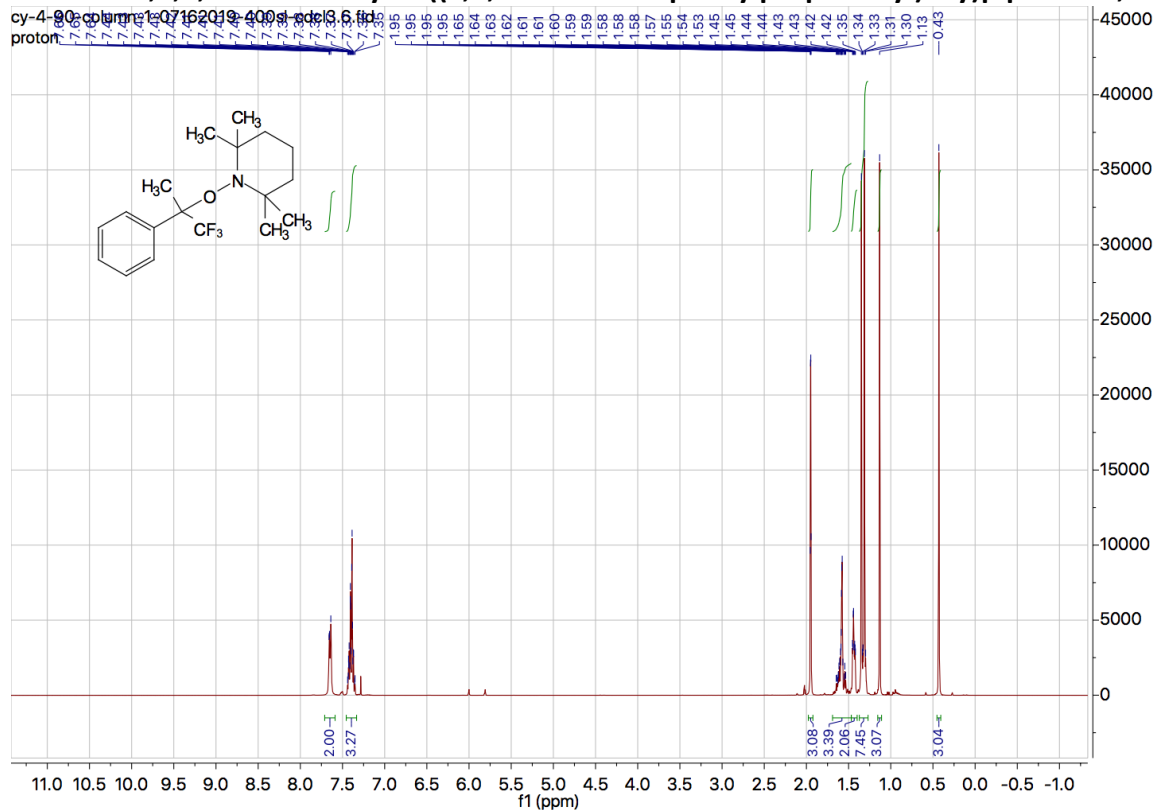

**<sup>13</sup>C-NMR: 2,2,6,6-tetramethyl-1-((1,1,1-trifluoro-2-phenylpropan-2-yl)oxy)piperidine, 6**

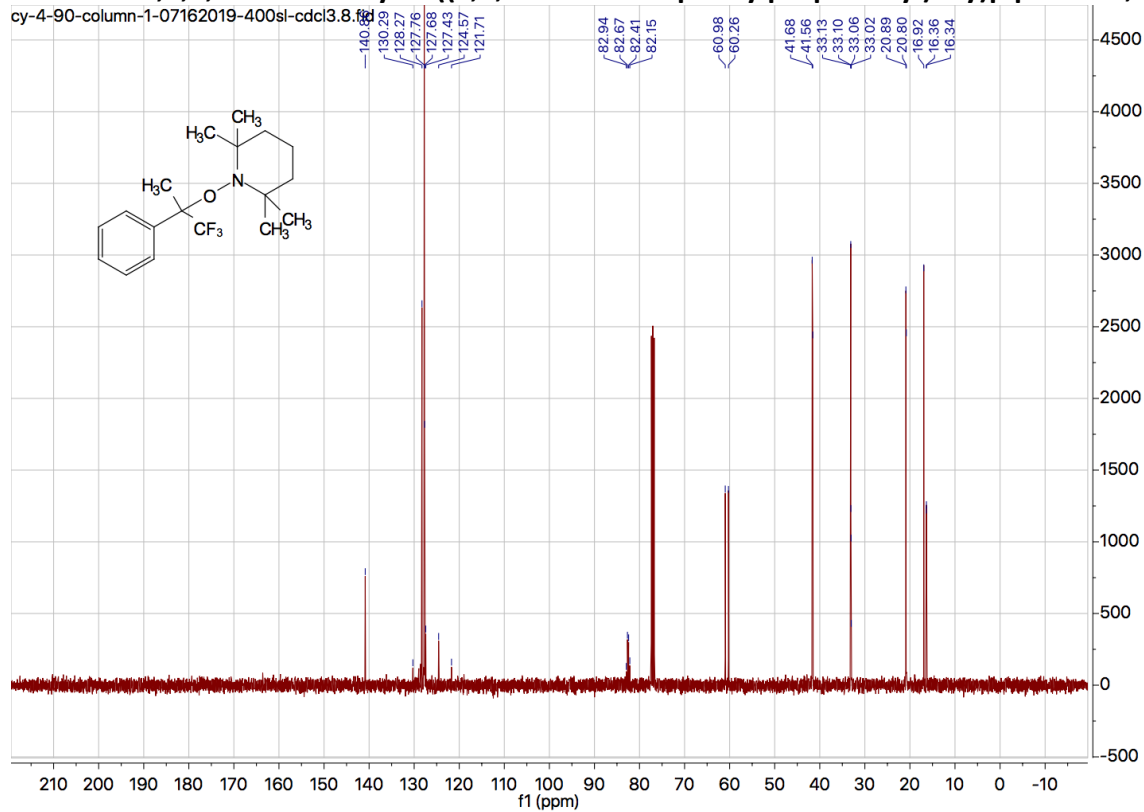

**<sup>19</sup>F-NMR: 2,2,6,6-tetramethyl-1-((1,1,1-trifluoro-2-phenylpropan-2-yl)oxy)piperidine, 6**

cy-4-90-column-1-07162019-400sl-cdcl3.7.fid

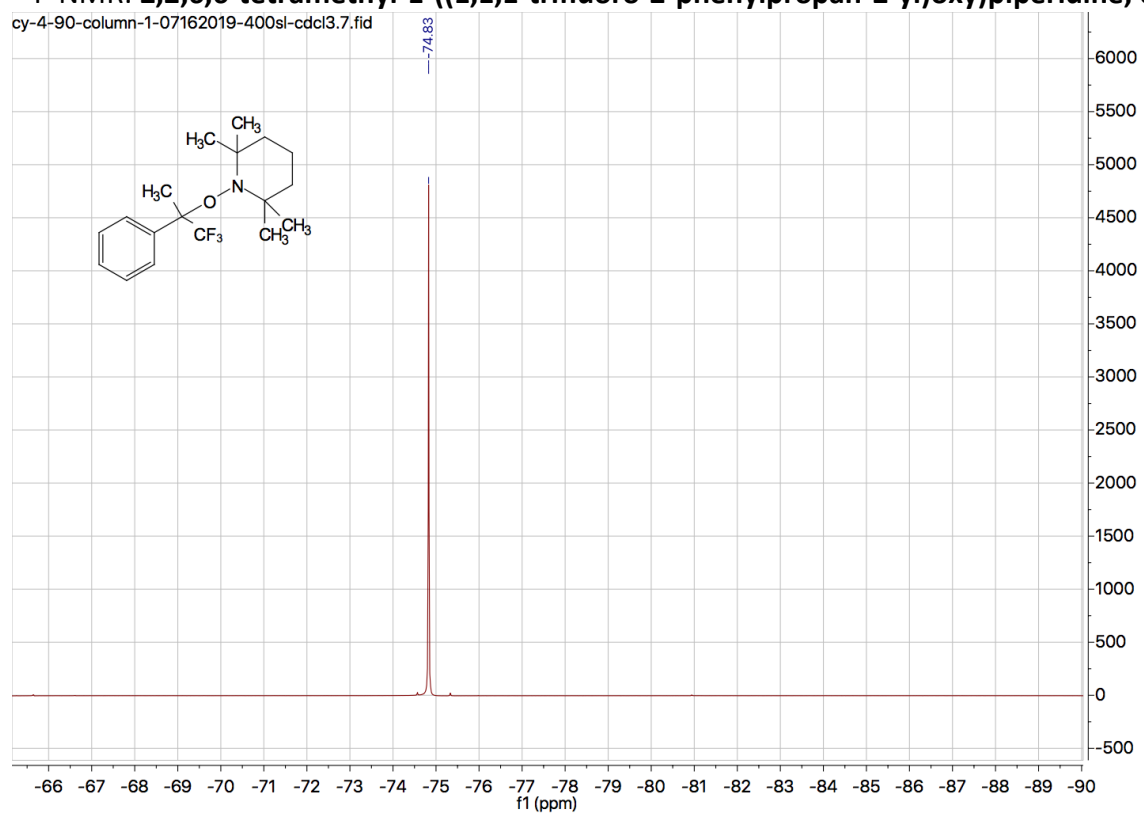

## Crystal Structure of Compound 6

Table S1. Crystal, intensity, collection, and refinement data of **6**

|                                                              |                                                       |
|--------------------------------------------------------------|-------------------------------------------------------|
| lattice                                                      | Orthorhombic                                          |
| formula                                                      | C <sub>18</sub> H <sub>26</sub> F <sub>3</sub> N O    |
| formula weight                                               | 329.40                                                |
| space group                                                  | <i>P</i> 2 <sub>1</sub> 2 <sub>1</sub> 2 <sub>1</sub> |
| <i>a</i> /Å                                                  | 6.3624(3)                                             |
| <i>b</i> /Å                                                  | 10.6132(4)                                            |
| <i>c</i> /Å                                                  | 25.6176(11)                                           |
| $\alpha$ /°                                                  | 90                                                    |
| $\beta$ /°                                                   | 90                                                    |
| $\gamma$ /°                                                  | 90                                                    |
| <i>V</i> /Å <sup>3</sup>                                     | 1729.84 (13)                                          |
| <i>Z</i>                                                     | 4                                                     |
| temperature (K)                                              | 200                                                   |
| radiation ( $\lambda$ , Å)                                   | 0.71073                                               |
| $\rho$ (calcd.) g cm <sup>-3</sup>                           | 1.265                                                 |
| $\mu$ (Mo K $\alpha$ ), mm <sup>-1</sup>                     | 0.099                                                 |
| $\theta$ max, deg.                                           | 30.518                                                |
| no. of data collected                                        | 28510                                                 |
| no. of data                                                  | 5290                                                  |
| no. of parameters                                            | 213                                                   |
| <i>R</i> <sub>1</sub> [ <i>I</i> > 2 $\sigma$ ( <i>I</i> )]  | 0.0414                                                |
| <i>wR</i> <sub>2</sub> [ <i>I</i> > 2 $\sigma$ ( <i>I</i> )] | 0.0981                                                |
| <i>R</i> <sub>1</sub> [all data]                             | 0.0541                                                |
| <i>wR</i> <sub>2</sub> [all data]                            | 0.1069                                                |
| GOF                                                          | 1.029                                                 |
| <i>R</i> <sub>int</sub>                                      | 0.061                                                 |



The structure of **6** has been confirmed by single-crystal X-ray diffraction (Figure 2). The fact that the CF<sub>3</sub> group is not disordered suggests an attractive interaction between one of its F's and something else. However, the shortest distance between an F and the carbon of the closest methyl (3.143(3) Å) is long in comparison with the F–C distances in compounds reported to have intramolecular [C–F•••H–C] contacts: for example, the F–C distance is 2.996(3) Å in **7**<sup>20</sup> and 2.963(6) Å in **8** (Figure 3).<sup>21</sup> The interactions in **7** and **8** are reflected in the <sup>19</sup>F–<sup>1</sup>H and <sup>19</sup>F–<sup>13</sup>C coupling constants that are observed in both cases — but we see no such coupling in **6**. The interaction between the CF<sub>3</sub> and the closest piperidine methyl in **6** is therefore insignificant.

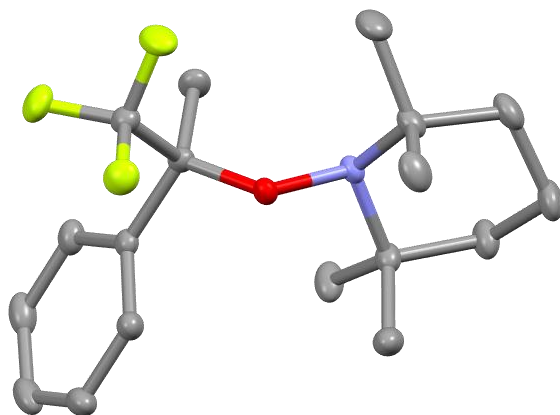

**Figure S1.** Molecular structure of TEMPO-adduct **6**. Hydrogen atoms are omitted for clarity.

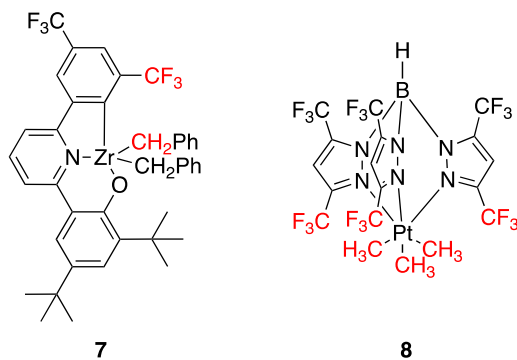

**Figure S2.** Compounds reported to have intramolecular [C–F•••H–C] contacts.

## References

1. Molander, G. A.; Iannazzo, L., Palladium-Catalyzed Hiyama Cross-Coupling of Aryltrifluorosilanes with Aryl and Heteroaryl Chlorides. *J. Org. Chem.* **2011**, *76* (21), 9182-9187.
2. Trost, B. M.; Debien, L., Palladium-Catalyzed Trimethylenemethane Cycloaddition of Olefins Activated by the  $\sigma$ -Electron-Withdrawing Trifluoromethyl Group. *J. Am. Chem. Soc.* **2015**, *137* (36), 11606-11609.

3. Liu, Y.; Zhou, Y.; Zhao, Y.; Qu, J., Synthesis of gem-Difluoroallylboronates via FeCl<sub>2</sub>-Catalyzed Boration/ $\beta$ -Fluorine Elimination of Trifluoromethyl Alkenes. *Org. Lett.* **2017**, *19* (4), 946-949.
4. Phelan, J. P.; Lang, S. B.; Compton, J. S.; Kelly, C. B.; Dykstra, R.; Gutierrez, O.; Molander, G. A., Redox-Neutral Photocatalytic Cyclopropanation via Radical/Polar Crossover. *J. Am. Chem. Soc.* **2018**, *140* (25), 8037-8047.
5. Lan, Y.; Yang, F.; Wang, C., Synthesis of gem-Difluoroalkenes via Nickel-Catalyzed Allylic Defluorinative Reductive Cross-Coupling. *ACS Catal.* **2018**, *8* (10), 9245-9251.
6. Lang, S. B.; Wiles, R. J.; Kelly, C. B.; Molander, G. A., Photoredox Generation of Carbon-Centered Radicals Enables the Construction of 1,1-Difluoroalkene Carbonyl Mimics. *Angew. Chem. Int. Ed.* **2017**, *56* (47), 15073-15077.
7. Engman, M.; Cheruku, P.; Tolstoy, P.; Bergquist, J.; Völker, S. F.; Andersson, P. G., Highly Selective Iridium-Catalyzed Asymmetric Hydrogenation of Trifluoromethyl Olefins: A New Route to Trifluoromethyl-Bearing Stereocenters. *Adv. Synth. Catal.* **2009**, *351* (3), 375-378.
8. Avenozza, A.; Busto, J. H.; Jiménez-Osés, G.; Peregrina, J. M., A Convenient Enantioselective Synthesis of (S)- $\alpha$ -Trifluoromethylisoserine. *J. Org. Chem.* **2005**, *70* (14), 5721-5724.
9. Phelan, J. P.; Wiles, R. J.; Lang, S. B.; Kelly, C. B.; Molander, G. A., Rapid access to diverse, trifluoromethyl-substituted alkenes using complementary strategies. *Chem. Sci.* **2018**, *9* (12), 3215-3220.
10. Fujita, T.; Konno, N.; Watabe, Y.; Ichitsuka, T.; Nagaki, A.; Yoshida, J.-i.; Ichikawa, J., Flash generation and borylation of 1-(trifluoromethyl)vinyllithium toward synthesis of  $\alpha$ -(trifluoromethyl)styrenes. *J. Fluorine Chem.* **2018**, *207*, 72-76.
11. Fujita, T.; Takazawa, M.; Sugiyama, K.; Suzuki, N.; Ichikawa, J., Domino C-F Bond Activation of the CF<sub>3</sub> Group: Synthesis of Fluorinated Dibenzo[a,c][7]annulenes from 2-(Trifluoromethyl)-1-alkenes and 2,2'-Diceriobiaryls. *Org. Lett.* **2017**, *19* (3), 588-591.
12. Xu, Z.; Hang, Z.; Chai, L.; Liu, Z.-Q., A Free-Radical-Promoted Site-Specific Cross-Dehydrogenative-Coupling of N-Heterocycles with Fluorinated Alcohols. *Org. Lett.* **2016**, *18* (18), 4662-4665.
13. Tian, H.; Shimakoshi, H.; Imamura, K.; Shiota, Y.; Yoshizawa, K.; Hisaeda, Y., Photocatalytic alkene reduction by a B<sub>12</sub>-TiO<sub>2</sub> hybrid catalyst coupled with C-F bond cleavage for gem-difluoroolefin synthesis. *Chem. Commun.* **2017**, *53* (68), 9478-9481.
14. Zhang, Z.; Yu, W.; Wu, C.; Wang, C.; Zhang, Y.; Wang, J., Reaction of Diazo Compounds with Difluorocarbene: An Efficient Approach towards 1,1-Difluoroolefins. *Angew. Chem. Int. Ed.* **2016**, *55* (1), 273-277.
15. Pohmakotr, M.; Boonkitpattarakul, K.; leawsuwan, W.; Jarussophon, S.; Duangdee, N.; Tuchinda, P.; Reutrakul, V.,  $\alpha,\alpha$ -Difluoro- $\alpha$ -phenylsulfanylmethyl carbanion equivalent: a novel gem-difluoromethylenation of carbonyl compounds. *Tetrahedron* **2006**, *62* (25), 5973-5985.
16. Zhu, L.; Ni, C.; Zhao, Y.; Hu, J., 1-tert-Butyl-1H-tetrazol-5-yl fluoromethyl sulfone (TBTSO2CH2F): a versatile fluoromethylidene synthon and its use in the synthesis of monofluorinated alkenes via Julia-Kocienski olefination. *Tetrahedron* **2010**, *66* (27), 5089-5100.
17. Qiao, Y.; Si, T.; Yang, M.-H.; Altman, R. A., Metal-Free Trifluoromethylation of Aromatic and Heteroaromatic Aldehydes and Ketones. *J. Org. Chem.* **2014**, *79* (15), 7122-7131.

18. Hu, M.; Ni, C.; Li, L.; Han, Y.; Hu, J., gem-Difluoroolefination of Diazo Compounds with TMSCF<sub>3</sub> or TMSCF<sub>2</sub>Br: Transition-Metal-Free Cross-Coupling of Two Carbene Precursors. *J. Am. Chem. Soc.* **2015**, *137* (45), 14496-14501.
19. Krishnamoorthy, S.; Kothandaraman, J.; Saldana, J.; Prakash, G. K. S., Direct Difluoromethylenation of Carbonyl Compounds by Using TMSCF<sub>3</sub>: The Right Conditions. *Eur. J. Org. Chem.* **2016**, *2016* (29), 4965-4969.
20. Chan, M. C. W.; Kui, S. C. F.; Cole, J. M.; McIntyre, G. J.; Matsui, S.; Zhu, N.; Tam, K.-H., Neutron and X-ray Diffraction and Spectroscopic Investigations of Intramolecular [C-H...F-C] Contacts in Post-Metallocene Polyolefin Catalysts: Modeling Weak Attractive Polymer-Ligand Interactions. *Chem. Eur. J.* **2006**, *12* (9), 2607-2619.
21. Fekl, U.; van Eldik, R.; Lovell, S.; Goldberg, K. I., Effects of Trifluoromethyl Substituents in a Tris(pyrazolyl)borate Ligand: A Structural and Spectroscopic Study of Analogous Platinum(IV) Trimethyl Complexes. *Organometallics* **2000**, *19* (18), 3535-3542.
